# Supplementary material
Source: Research Square preprint supplement (doi:10.21203/rs.3.rs-8969222/v1)
Supplement: Supplementary file 1 [file e9ce20e087f863350139581d.pdf]

1 **Supplementary information for:**

2  
3 **Serum-stable RNA origami nanodevices for sensing and**  
4 **targeting**  
5

6 **Authors:**

7 Emil Laust Kristoffersen<sup>1,2\*</sup>, Nikolaj Holck Zwergius<sup>1</sup>, Nestor Sampedro Vallina<sup>1</sup>, Amanda  
8 Dyrholm Stange<sup>3</sup>, Lasse Messell Desdorf<sup>3</sup>, Sofie Thomsen<sup>1,3</sup>, Victoria Birkedal<sup>1,3</sup>, Nicolas  
9 Glück<sup>1,4</sup>, Laia Civit<sup>1,2</sup>, Cody Geary<sup>1,5</sup>, Jørgen Kjems<sup>1,2\*</sup>, Julian Valero<sup>1,2\*</sup>, Ebbe Sloth  
10 Andersen<sup>1,2\*</sup>

11  
12 **Affiliations:**

13 <sup>1</sup>Interdisciplinary Nanoscience Center (iNANO), Aarhus University, 8000 Aarhus, Denmark.

14 <sup>2</sup>Department of Molecular Biology and Genetics, Aarhus University, 8000 Aarhus, Denmark.

15 <sup>3</sup>Department of Chemistry, Aarhus University, 8000 Aarhus, Denmark.

16  
17 **Current affiliations:**

18 <sup>4</sup>Department of Bioscience, School of Natural Sciences, Technical University of Munich,  
19 85748 Garching, Germany.

20 <sup>5</sup>Center for Molecular Biology of Heidelberg University (ZMBH), University of Heidelberg,  
21 69120 Heidelberg, Germany.

22  
23 \*Corresponding authors.

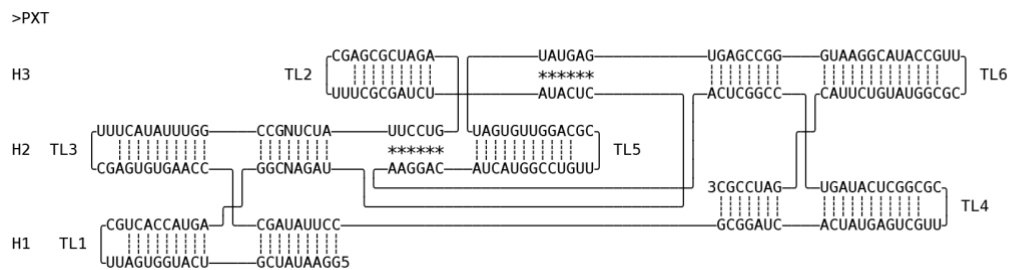

**Supplementary Fig. 1. Blueprint for paranemic crossover tile (PXT).** Coaxially stacked helices (H) are numbered from 5' to 3' end. Paranemic crossover (PX) base pairs are annotated by \*. Tls are numbered from 5' to 3' end. TL3 is marked.

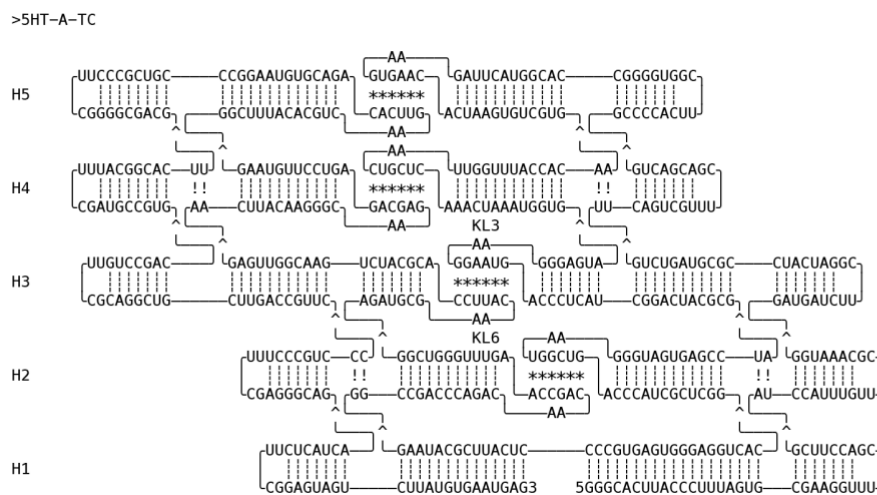

**Supplementary Fig. 2. Blueprint for 5-helix tile A twist corrected (5HT-A-TC).** Coaxially stacked helices (H) are numbered from 5' to 3' end. Kissing loop (KL) base pairs are annotated by \*. KL3 and KL6 are annotated next to their AA-bulges. Dovetail base pairs are annotated with !.

>6HBC

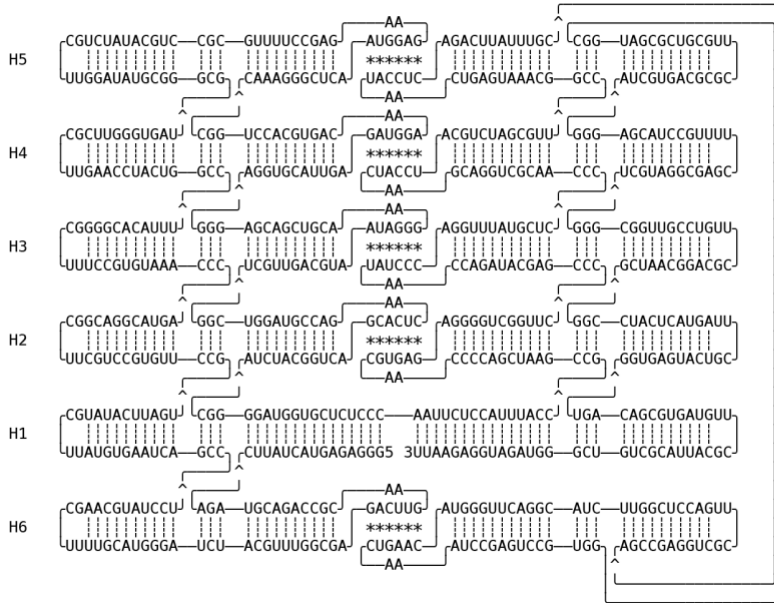

1  
2 **Supplementary Fig. 3. Blueprint for 6-helix bundle clasp (6HBC).** Coaxially stacked  
3 helices (H) are numbered from 5' to 3' end except for H6. Kissing loop (KL) base pairs are  
4 annotated by \*.  
5

>6HBC-TC

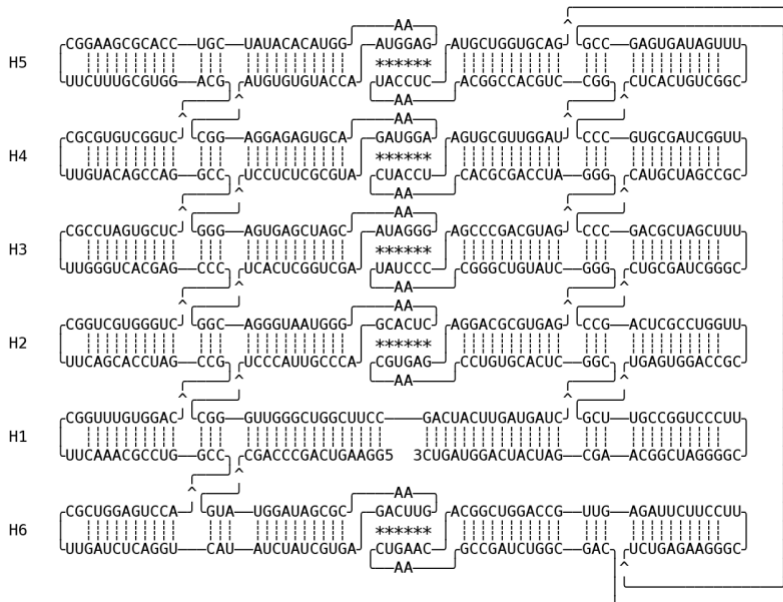

6  
7 **Supplementary Fig. 4. Blueprint for 6-helix bundle clasp twist corrected (6HBC-TC).**  
8 Coaxially stacked helices (H) are numbered from 5' to 3' end except for H6. Kissing loop (KL)  
9 base pairs are annotated by \*.  
10

>3HT-BP

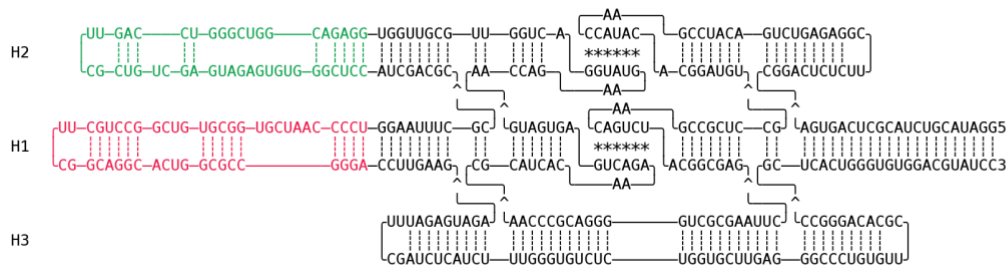

1  
2 **Supplementary Fig. 5. Blueprint for 3-helix tile with Broccoli and Pepper aptamers (3HT-**  
3 **BP).** Coaxially stacked helices (H) are numbered from 5' to 3' end. Kissing loop (KL) base  
4 pairs are annotated by \*. Broccoli marked in green, Pepper in red.

5

>14-14

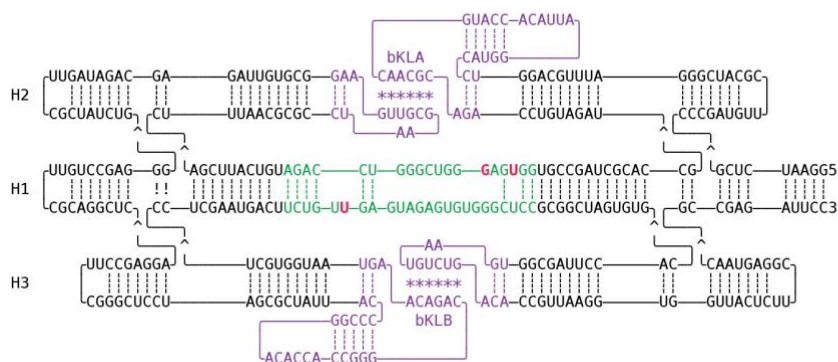

6  
7 **Supplementary Fig. 6. Blueprint for 3-helix tile with internal iSpinach aptamer**  
8 **(Traptamer).** Coaxially stacked helices (H) are numbered from 5' to 3' end. Branched kissing  
9 loop (bKL) base pairs are annotated by \* and annotated as bKLA and bKLB (purple). The  
10 sequence differences in the iSpinach aptamer (green) in comparison to the Broccoli aptamer  
11 are marked in bold and red.

12

>PXT-antispikes

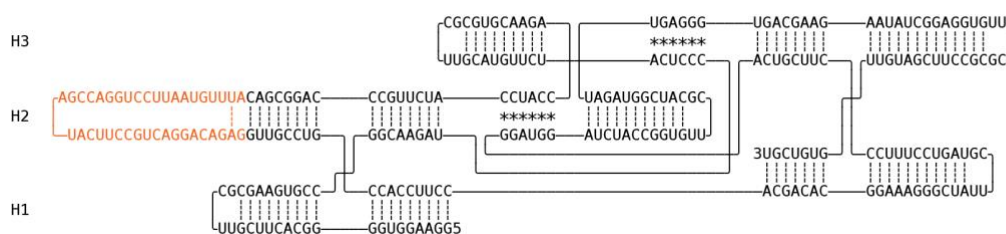

13  
14 **Supplementary Fig. 7. Blueprint for paranemic crossover tile with anti-Spike aptamer**  
15 **(PXT-Spike).** Coaxially stacked helices (H) are numbered from 5' to 3' end. Paranemic  
16 crossover (PX) base pairs are annotated by \*. The anti-Spike aptamer is marked in orange.

17

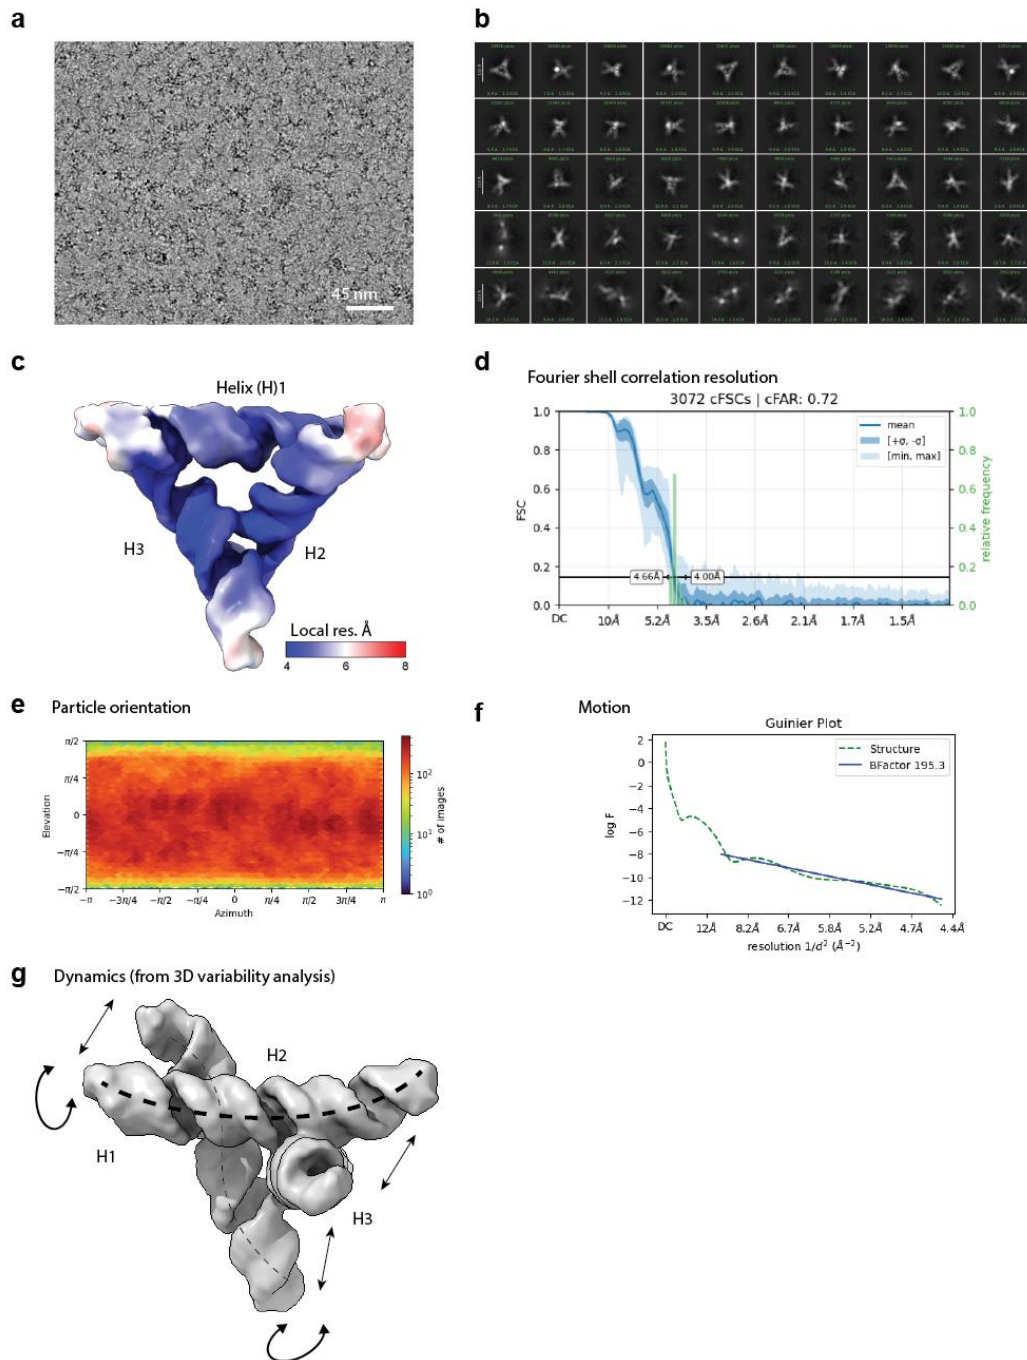

1  
 2 **Supplementary Fig. 8. Cryo-EM analysis overview of the FY-RNA paranemic crossover**  
 3 **triangle (PXT).** Examples of (a) contrast transfer function (CTF)-fitted and motion corrected  
 4 micrograph of ice with FY-RNA PXT particles and (b) 2D classes generated during the cryo-  
 5 EM analysis. c, show cryo-EM density coloured for local resolution, (d) the Fourier shell  
 6 correlation (FSC) plot, (e) the particle orientation, and (f) the B-factor fit. g, shows the observed  
 7 density variation assessed by 3D classification and 3D variability analysis indicative of internal  
 8 particle dynamics and flexibility. Arrows and dashed lines indicate the twisting and bending of  
 9 the helices relative to each other.  
 10

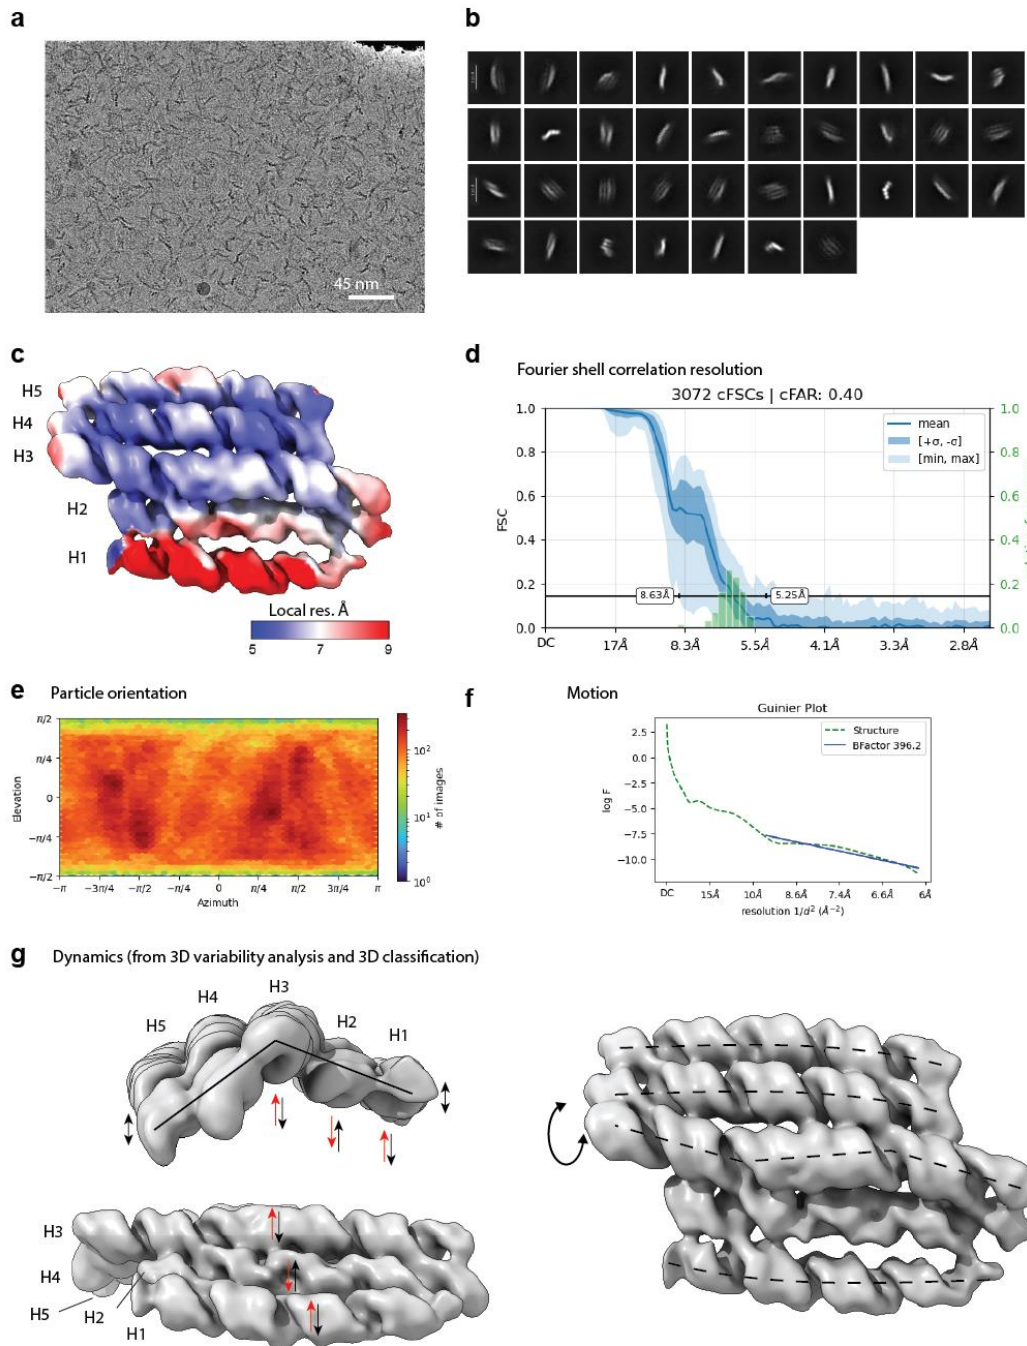

1  
 2 **Supplementary Fig. 9. Cryo-EM analysis overview of the FY-RNA 5-helix tile (5HT).**  
 3 Examples of (a) contrast transfer function (CTF)-fitted and motion corrected micrograph of ice  
 4 with FY-RNA 5HT particles and (b) 2D classes generated during the cryo-EM analysis. c,  
 5 show cryo-EM density coloured for local resolution, (d) the Fourier shell correlation (FSC)  
 6 plot, (e) the particle orientation, and (f) the B-factor fit. (g) shows the observed density  
 7 variation assessed by 3D classification and 3D variability analysis indicative of internal particle  
 8 dynamics and flexibility. Arrows and dashed lines indicate the twisting and bending of the  
 9 helices relative to each other. Red and black arrows indicate that helices bend up and in  
 10 turn.

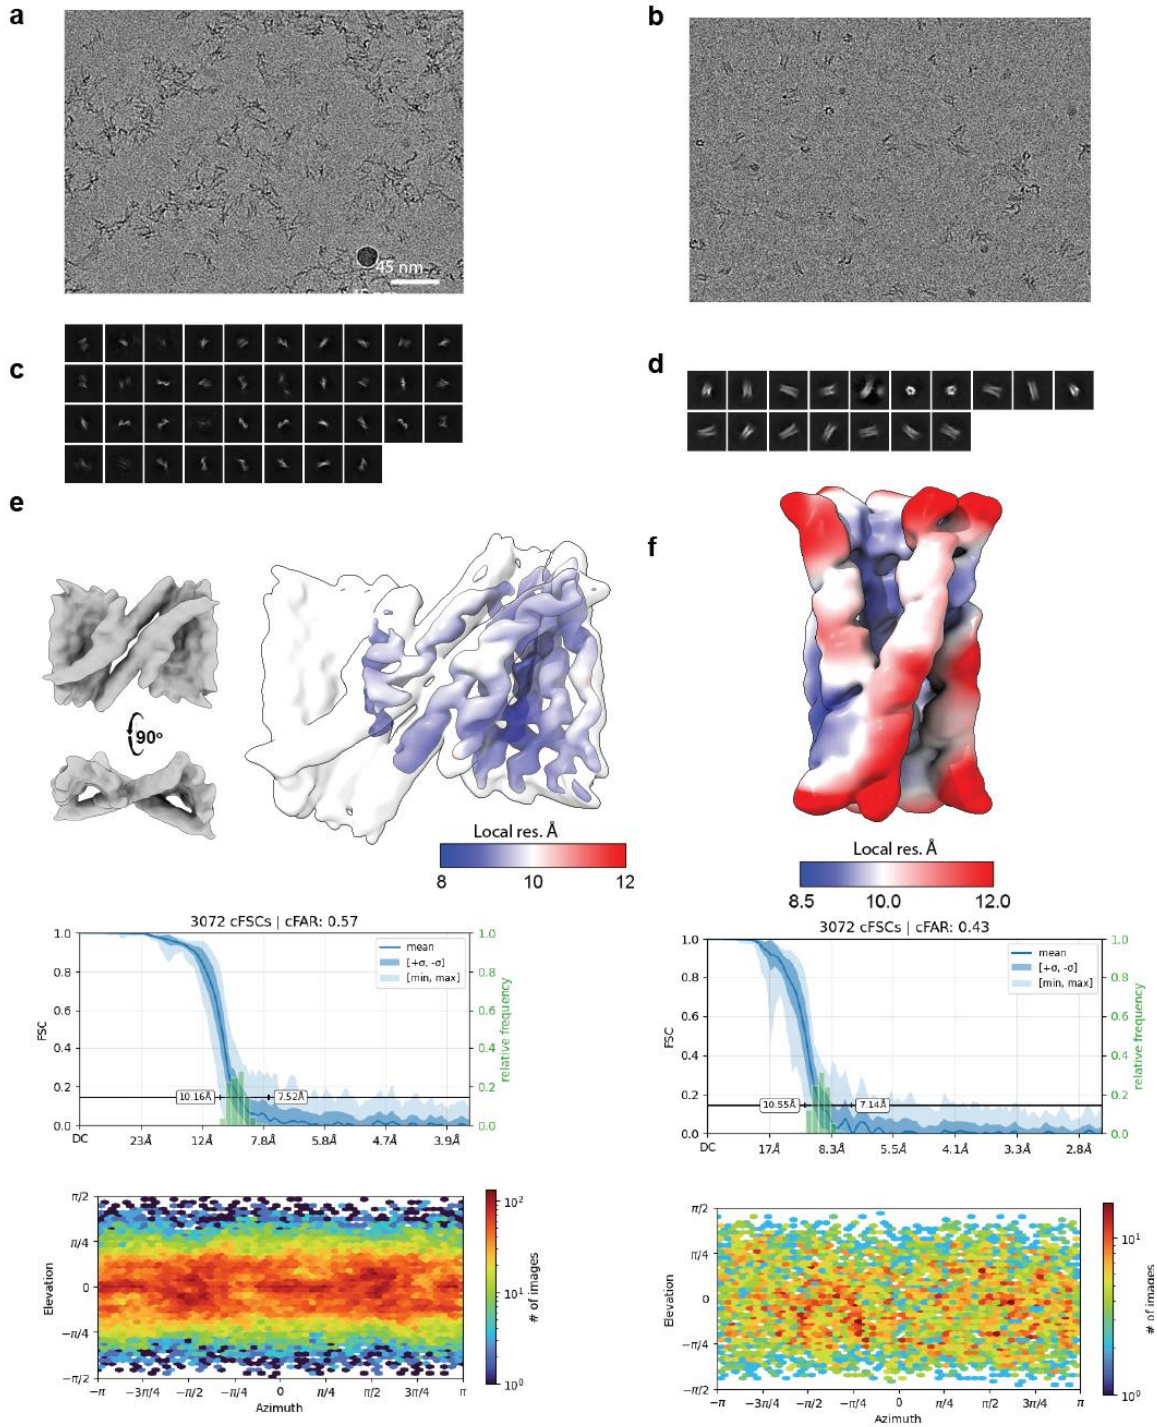

1  
2 **Supplementary Fig. 10. Cryo-EM analysis overview of the FY-RNA 6-helix bundle with**  
3 **a clasp (6HB-C). a,b,** Examples of contrast transfer function (CTF)-fitted and motion  
4 corrected micrograph of ice with two different FY-RNA 6HB-C designs, the optimized design  
5 and the original design, respectively. **c,d,** show 2D classes generated during the cryo-EM  
6 analysis of the respective samples. **e,f,** show cryo-EM density coloured for local resolution,  
7 Fourier shell correlation (FSC) plots, and particle orientation plots.

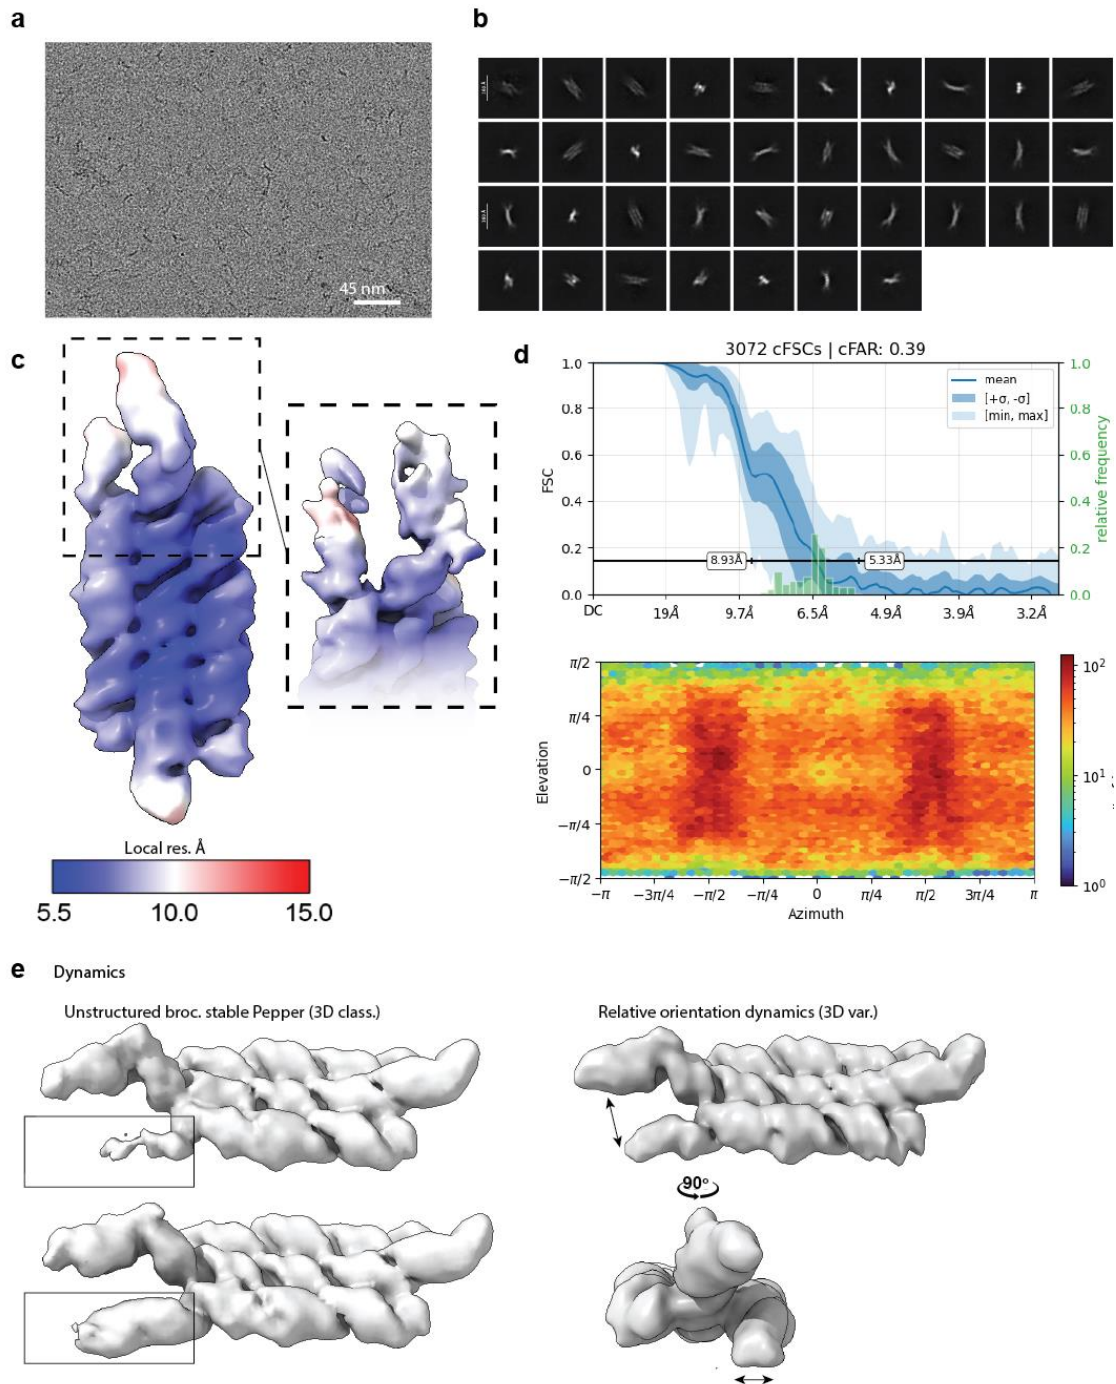

1  
 2 **Supplementary Fig. 11. Cryo-EM analysis overview of the FY-RNA 3-helix tile with**  
 3 **Papper and Broccoli (3HT-PB).** **a**, Example of contrast transfer function (CTF)-fitted and  
 4 motion corrected micrograph of ice with FY-RNA 3HT-PB particles. **b**, 2D classes generated  
 5 during the cryo-EM analysis. **c**, Cryo-EM density coloured for local resolution. **d**, Fourier shell  
 6 correlation (FSC) plot and orientation analysis. **e**, Result of 3D classification analysis (left)  
 7 revealing sub-populations of the particles where Broccoli is undefined in comparison with the  
 8 rest of the structure. Results of the 3D variability analysis (right) revealing internal dynamics  
 9 in the relative positioning and orientation of the fluorogenic aptamers.

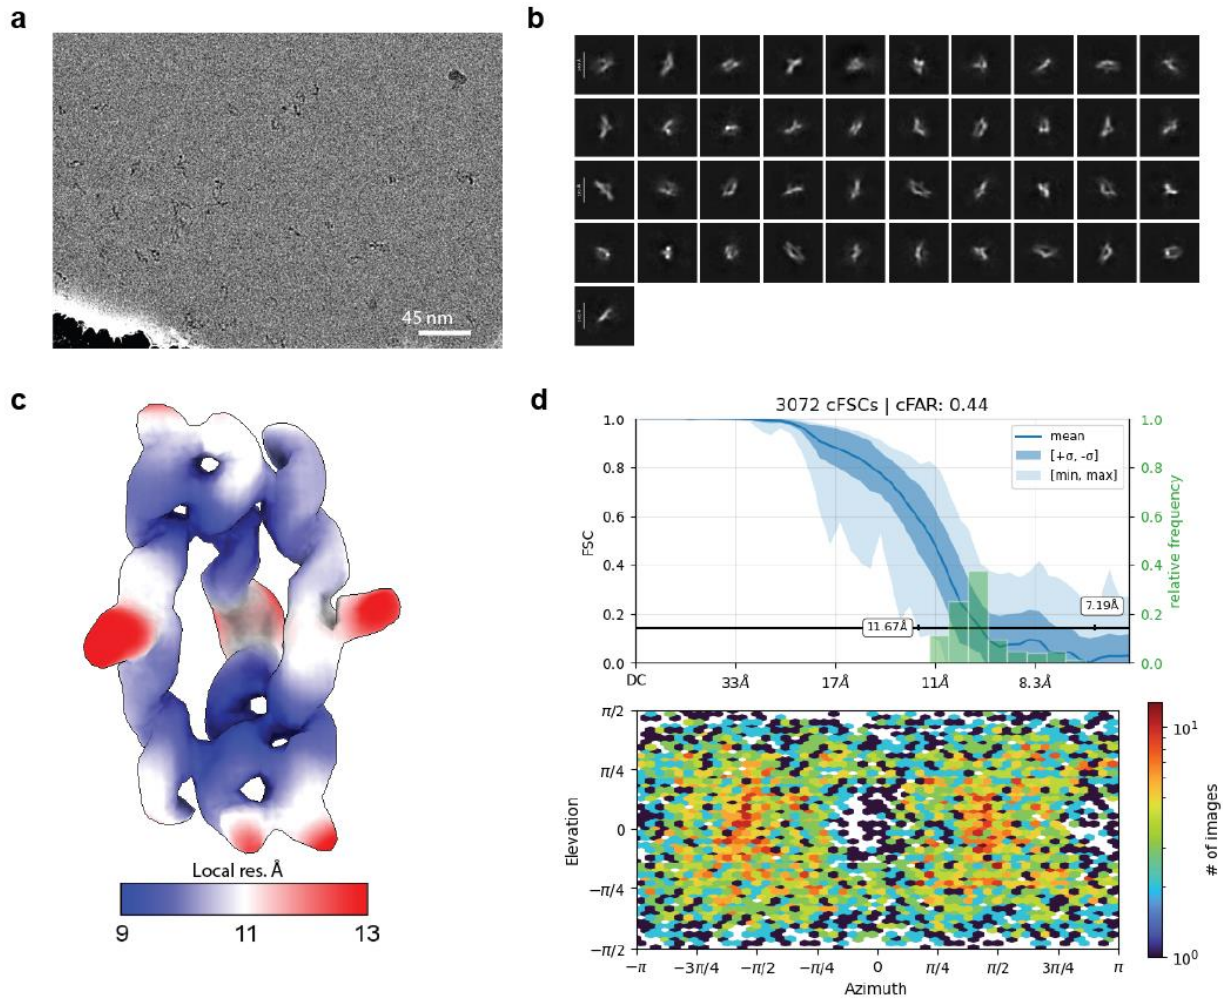

1  
 2 **Supplementary Fig. 12. Cryo-EM analysis overview of the FY-RNA Traptamer.** **a**,  
 3 Example of contrast transfer function (CTF)-fitted and motion corrected micrograph of ice with  
 4 FY-RNA Traptamer particles. **b**, 2D classes generated during the cryo-EM analysis. **c**, Cryo-  
 5 EM density coloured for local resolution. **d**, Fourier shell correlation (FSC) plot and orientation  
 6 analysis.  
 7

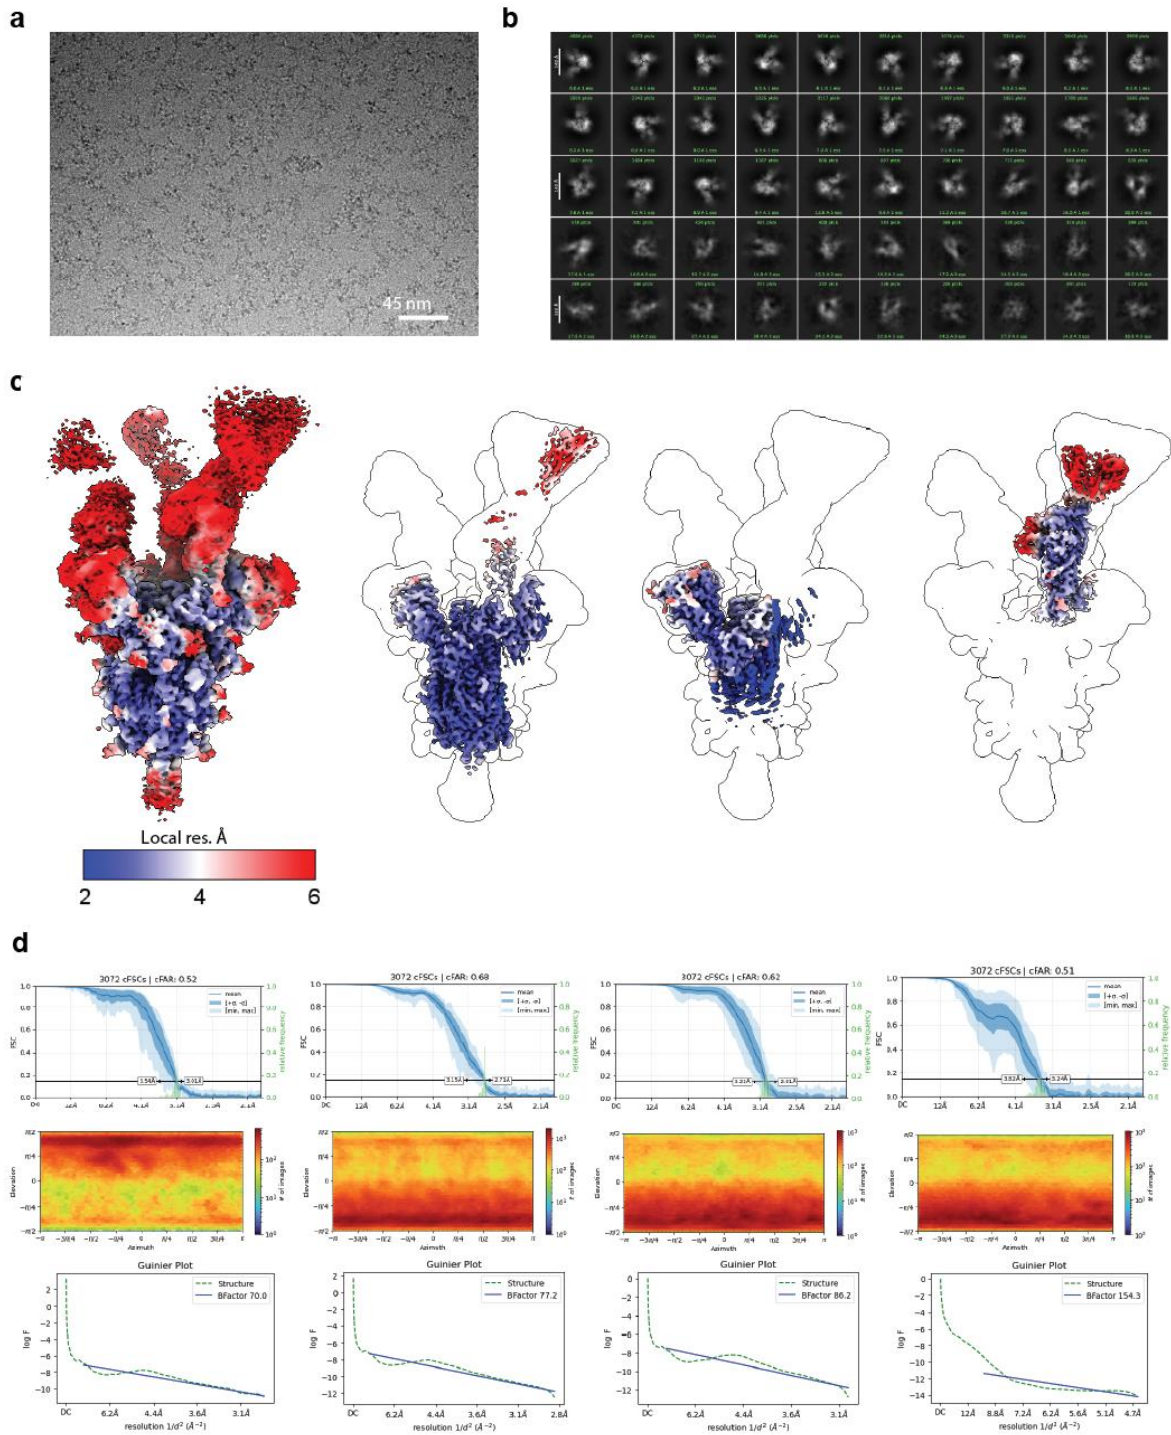

1  
2 **Supplementary Fig. 13. Cryo-EM analysis overview of the SARS-CoV-2 spike protein**  
3 **with FY-RNA PXT with anti-spike protein aptamer.** **a**, Contrast transfer function (CTF)-  
4 fitted and motion corrected micrograph of ice with SARS-CoV-2 spike protein and FY-RNA  
5 PXT with anti-spike protein aptamer particles. **b**, 2D classes generated during the cryo-EM  
6 analysis. **c**, Cryo-EM density coloured for local resolution of the different focus maps. **d**,  
7 Fourier shell correlation (FSC) plot, orientation analysis and Guinier plots.

**a** 3D flex analysis (full structure, no symmetry imposed)

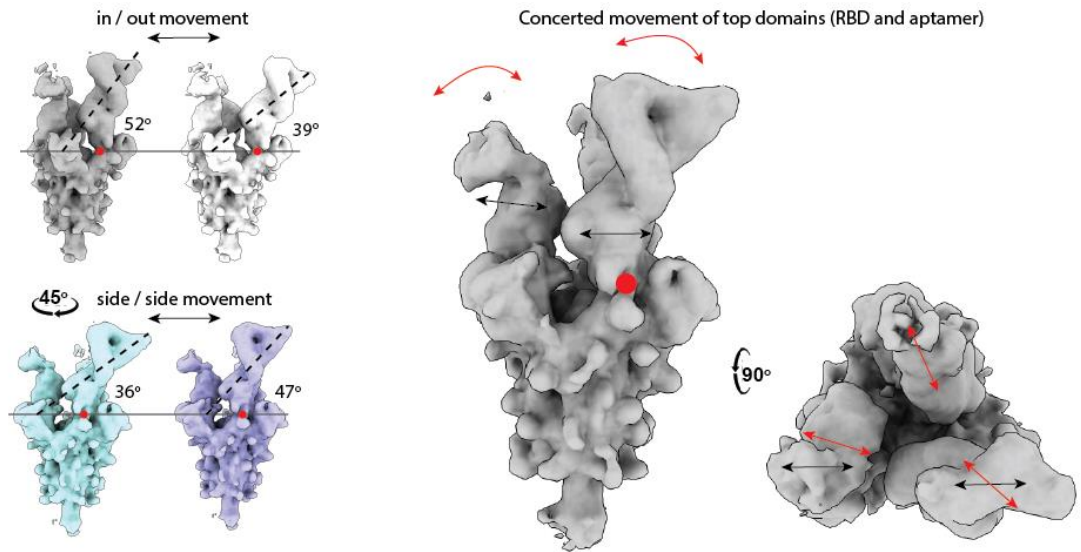

**b** 10-class 3D classification (only the monomer)

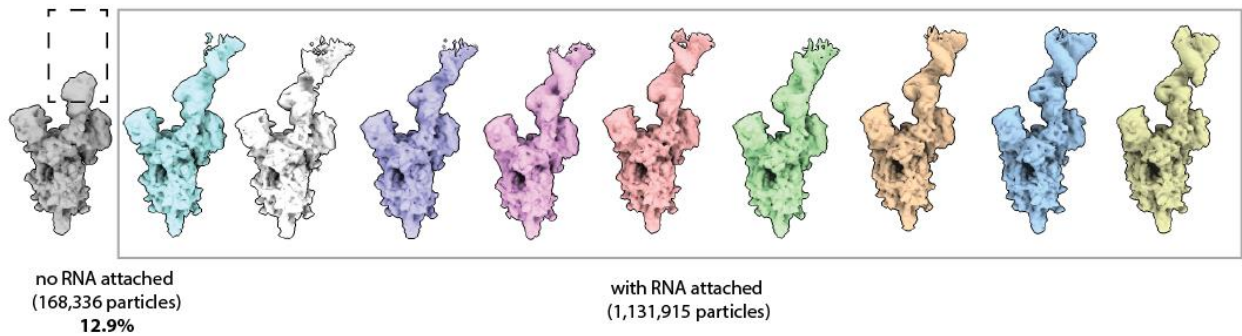

**c** 3D classification (only the RBD and aptamer)

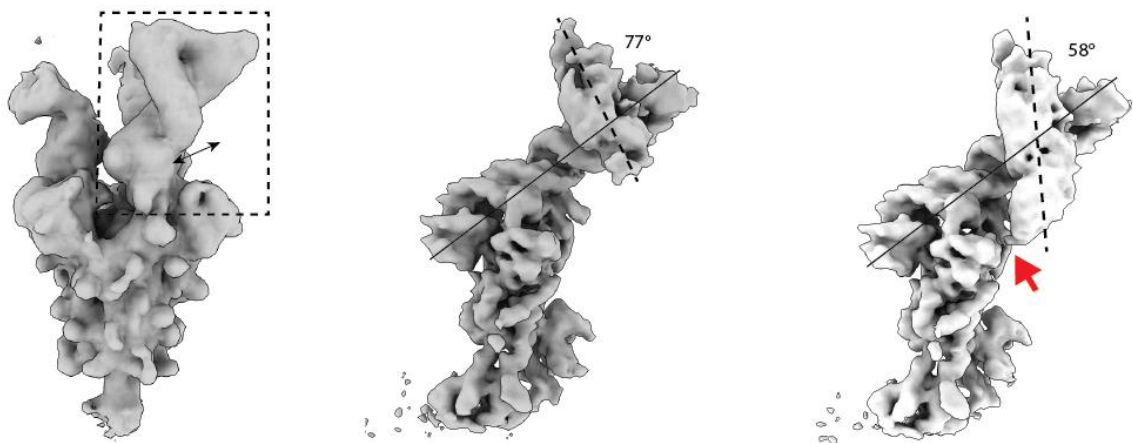

1  
2 **Supplementary Fig. 14. Dynamic analysis of the SARS-CoV-2 spike protein with FY-**  
3 **RNA PXT with aptamer density maps. a, 3Dflex analysis of the non-symmetry expanded**  
4 **structure revealing coordinated movement of the regions corresponding to the RBD and FY-**  
5 **RNA origami device is located. The movement happens around a “hinge point” (red spot) at**  
6 **the base of the RBD domain. This concerted movement and the extra density at all three RBD**  
7 **locations, indicate that at least some of the particles have three PXT with aptamers bound**  
8 **simultaneously. However, the extra density at the RBD location is strongest at position 1 and**  
9 **diminishes at positions 2 and 3, indicating that not all particles have three FY-RNA origami**

1 devices bound, some have two and some have one. **b**, 10-class 3D classification of symmetry  
2 expanded particles revealing that 12.9 % did not have extra density at the RBD domain. This  
3 likely represents the fraction of particles that do not have any FY-RNA origami device bound.  
4 Assuming no cooperativity, this would mean that 66.1% of the spike proteins have three  
5 origamis bound, 29.4% would have two, and 4.3% would have one, and 0.2% would have no  
6 bound. **c**, 3D classification of the RBS focus map, revealing the same kind of dynamic  
7 movement observed in (A), and in addition some dynamics of the angle of the PXT helix 1,  
8 sometimes interacting with the RBD-domain through the TL (red arrow).  
9



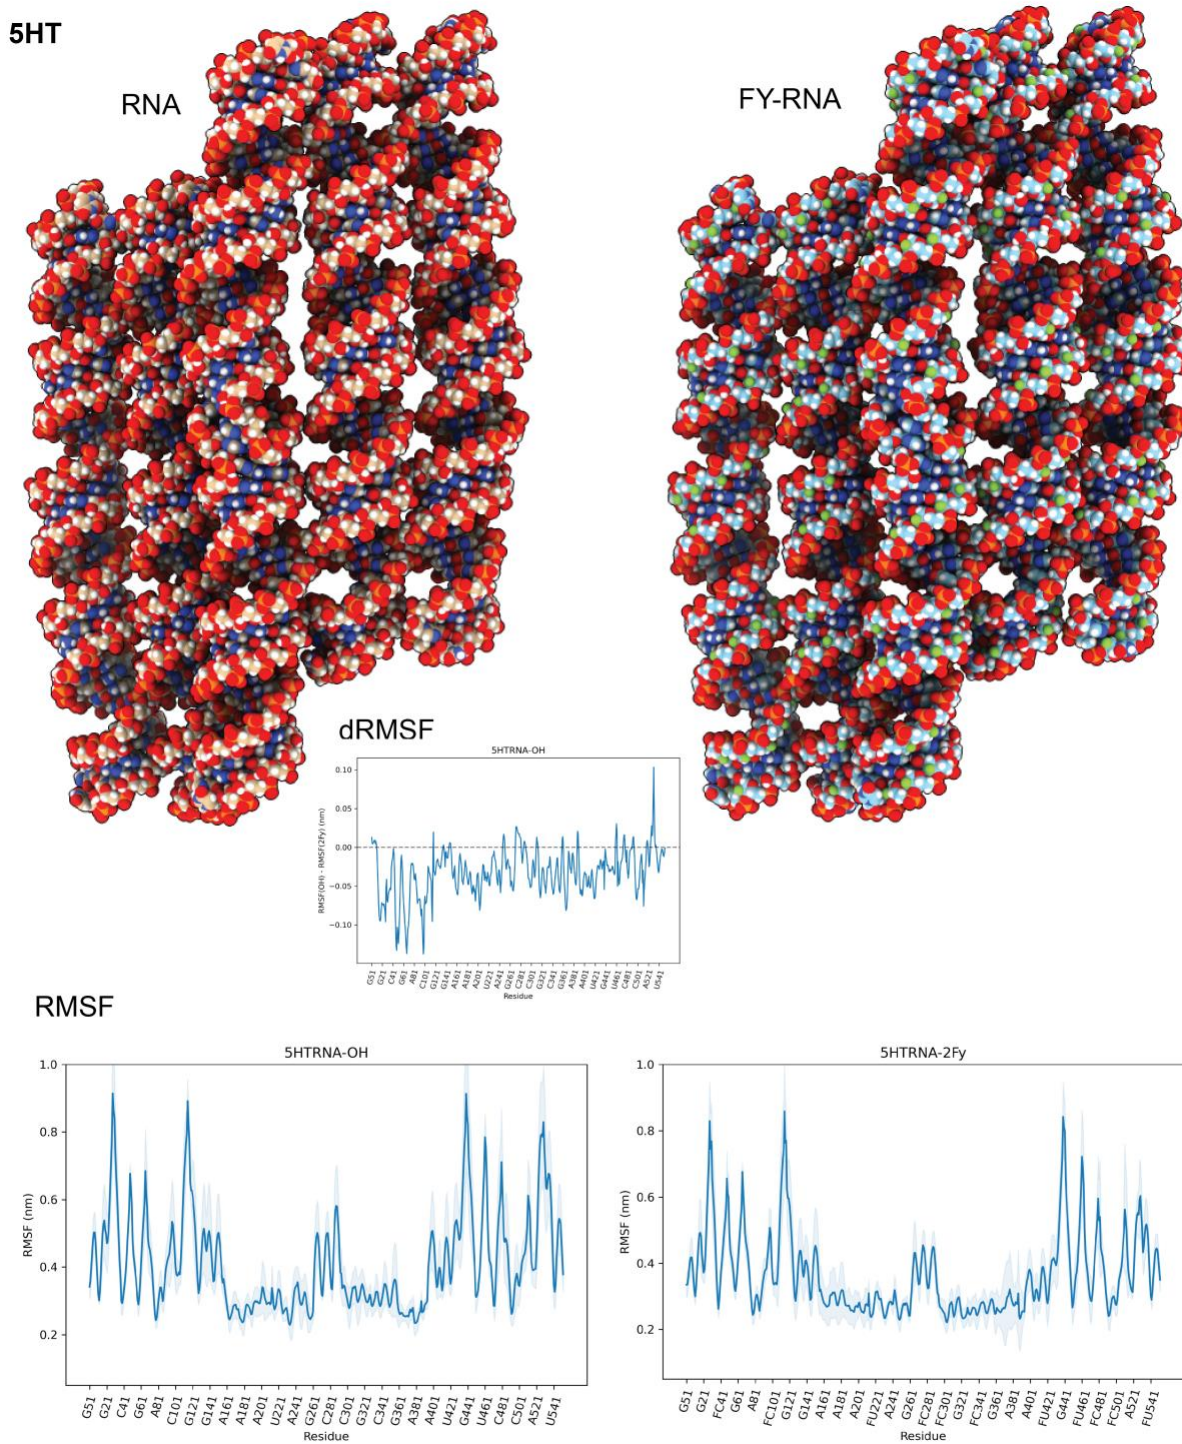

1  
 2 **Supplementary Fig. 16. MD-simulation of the 5HT.** Simulated structures of the 5HT as RNA  
 3 and FY-RNA. Corresponding RMSF and  $\Delta$ RMSF plots are shown. The simulation reveals that  
 4 fluctuation was observed in the 10 helix ends, indicated by the peaks in RMDF in the start and  
 5 end of the sequence. In addition, the central part of the molecule (between  $\sim$ G261 and C301)  
 6 was fluctuating. This is the region that base pairs with the 5'- and 3'-end of the molecule.

## 5HT

### Pucker

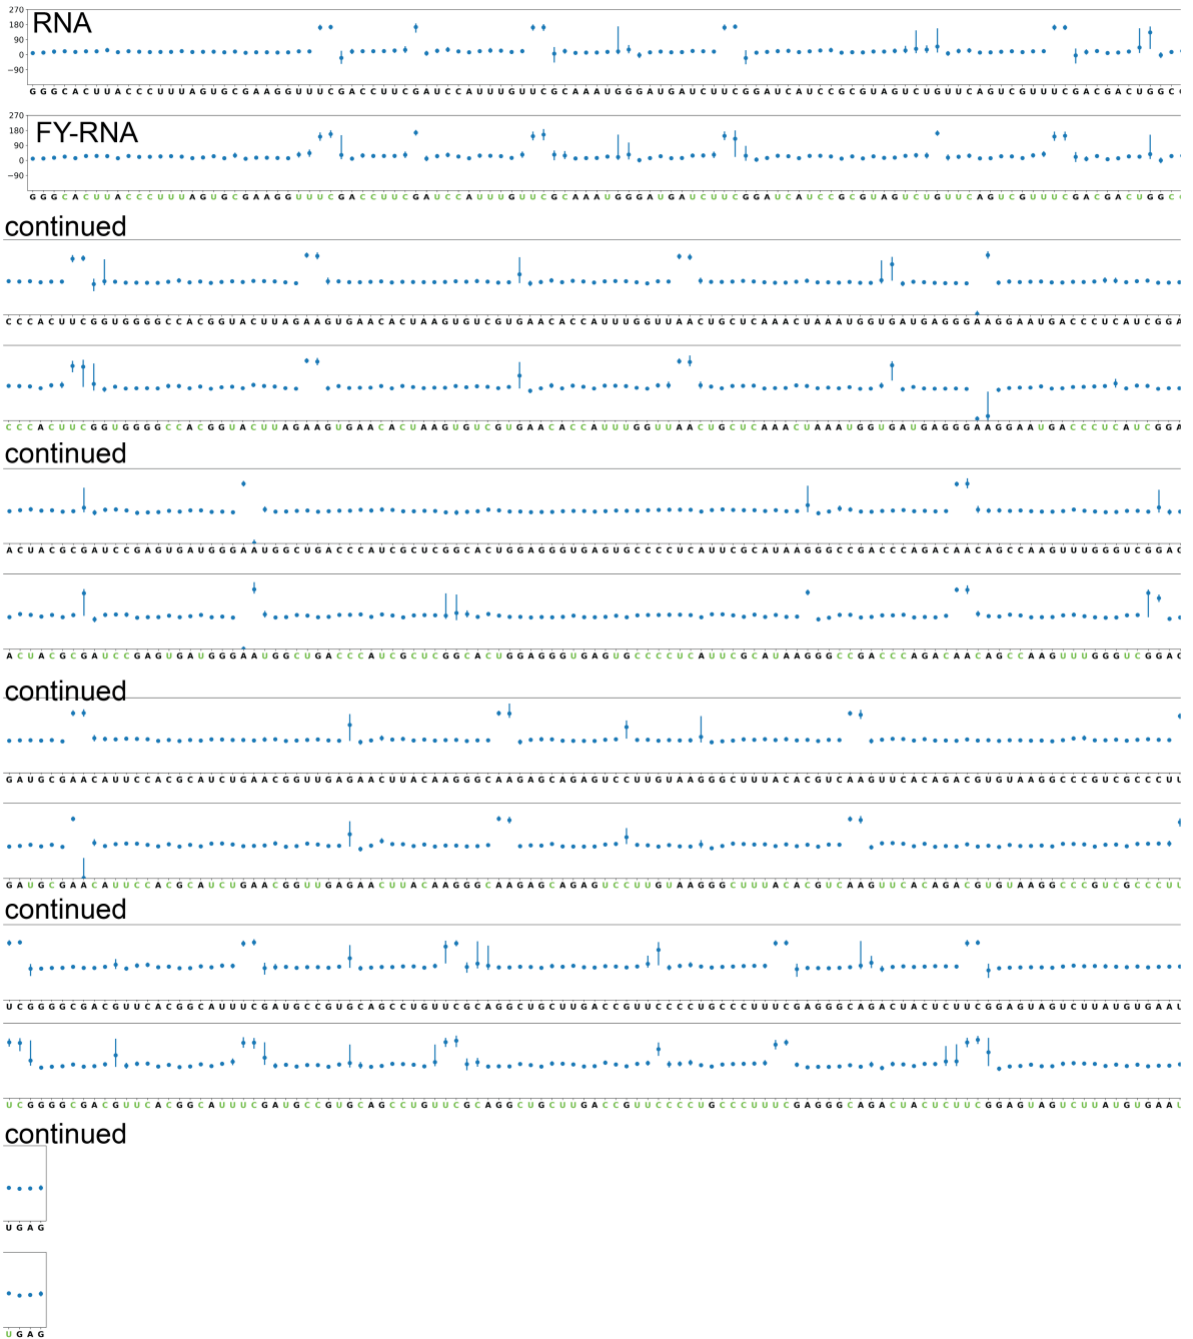

1  
2 **Supplementary Fig. 17. Pucker plots for the 5HT.** Simulated structures of the 5HT as RNA  
3 and FY-RNA. The pucker plot shows that C2'-endo conformation was seen in the U and C  
4 residues of the UUCG TL, the A-residues of the KLS, and sometimes in the 5'-end residues of  
5 the crossover (indicated by arrows).  
6

## Helix (A-form)

FY-RNA

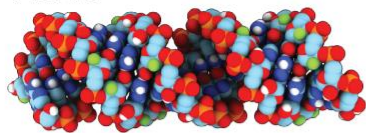

RNA

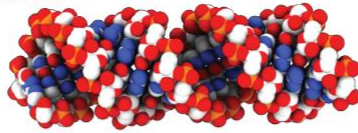

F-RNA

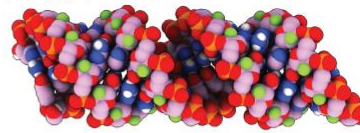

RMSF

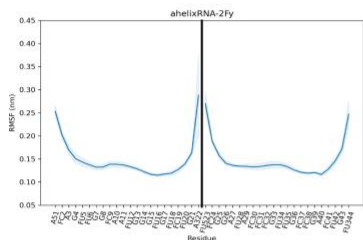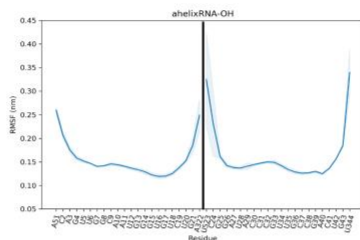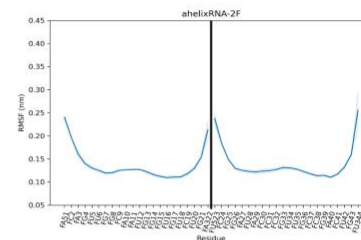

dRMSF

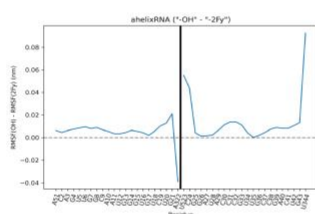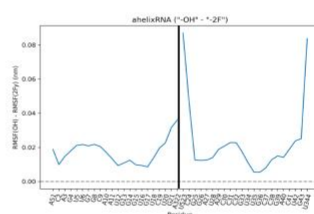

Inclination

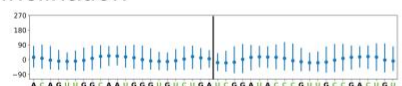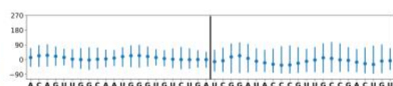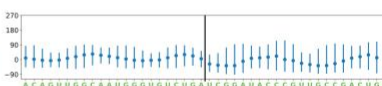

Pucker

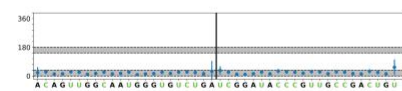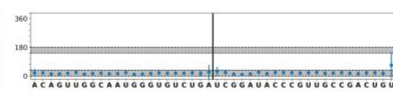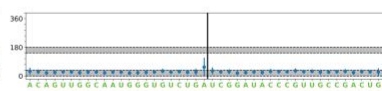

Rise

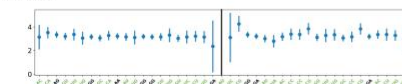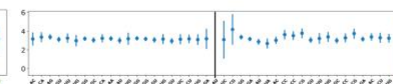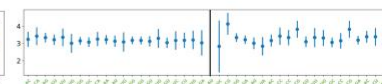

Twist

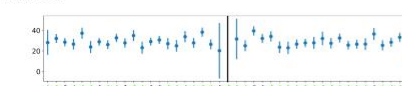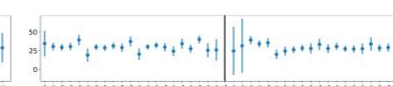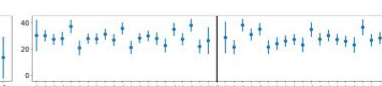

1  
2 **Supplementary Fig. 18. MD-simulation of A-form helical NAs.** Simulated structures of  
3 double helix segment of FY-RNA, RNA and F-RNA and corresponding RMSF,  $\Delta$ RMSF,  
4 Inclination, Pucker, Rise and Twist plots. These look very similar as expected for the A-form  
5 helix and is used as a validation of the forcefield and parameters of the simulation.

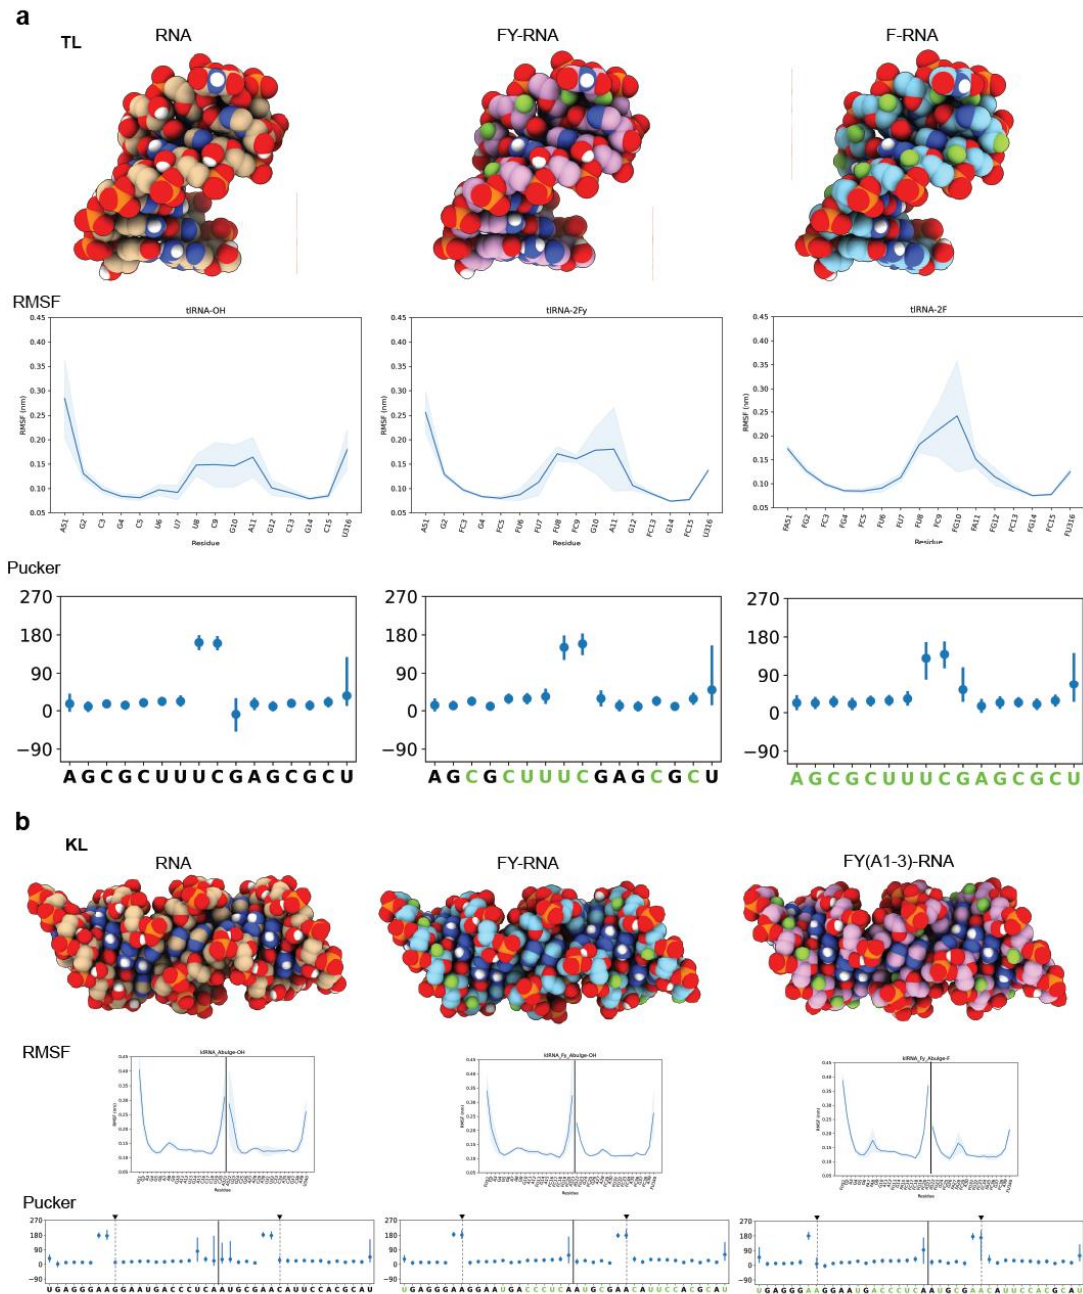

1  
2 **Supplementary Fig. 19. MD-simulation of the TL (top) and KL (bottom).** **a**, Simulated  
3 structures of the UUCG TL as RNA, FY-RNA and F-RNA. Corresponding RMSF, and Pucker  
4 plots are shown. The simulation reveals that fluctuation increases primarily in the G residue of  
5 the UUCG TL when it is simulated as FY-RNA or F-RNA. The pucker plots show that C2'-  
6 endo conformation is prominent in the U and C residues of the UUCG TL (indicated by  
7 arrows). This fits with the observation from the simulations of the full PXT and 5HT origamis.  
8 **b**, Simulated structures of the A-bulge KL as RNA, FY-RNA and FY-RNA + FY(A1-3)-RNA.  
9 Corresponding RMSF, and Pucker plots are shown. The simulation reveals a peak in the  
10 fluctuation of a particular A-bulge As only if these are simulated as F-RNA. The pucker plots  
11 show that the A-bulge A are almost exclusively in C2'-endo conformation, but that when  
12 changed to F-RNA this is changed. This fits with the observation from the simulations of the  
13 whole origamis PXT and 5HT showing that FY-RNA KLs are folding fine, but that F-RNA As

1 are destabilized. Simulation of the FY-RNA + F-RNA A-bulge As KL is, however, still stable  
2 and might form.

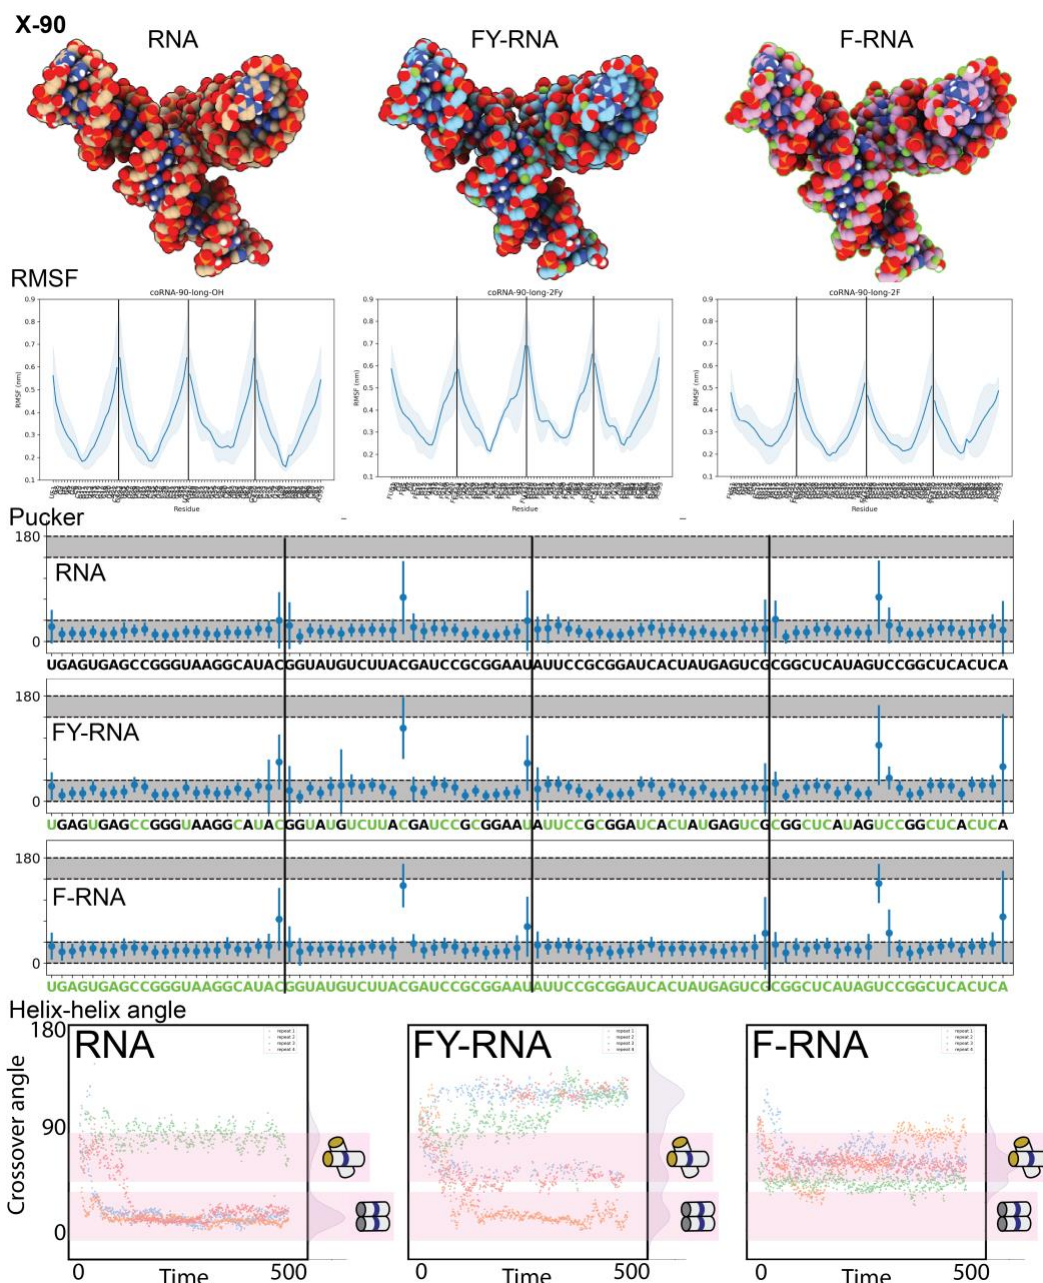

1  
2 **Supplementary Fig. 20. MD-simulation of the X-90 crossover.** Simulated structures of the  
3 X-90 as RNA, FY-RNA and F-RNA. Corresponding RMSF, Pucker plots, and helix angle plots  
4 are shown. The simulation reveals that fluctuation is lowest at the centre of the strands, which  
5 is where the CO is positioned. The pucker plots show that C2'-endo conformation is sometimes  
6 adapted in the 5' residue of the CO (indicated by arrows). Surprisingly the most adaptation of  
7 C2'-endo conformation is seen for the F-RNA, and could be explained by the increased base  
8 pairing in the helices (compared to RNA) which forces the less favourable conformation in the  
9 backbone of the residue that facilitates the CO. This fits with the observation from the  
10 simulations of the whole origamis PXT and 5HT. The Helix angle plot shows that the  
11 simulation of the RNA X-90 in most cases makes a parallel interaction, whereas FY-RNA and  
12 F-RNA adopts a crossed conformation, and remain to be more dynamic throughout the  
13 simulations. The parallelization of the RNA X-90 is caused by formation of HH interactions  
14 which are perturbed when the 2'-position is fluorinated.

### Anti-spike FY RNA aptamer

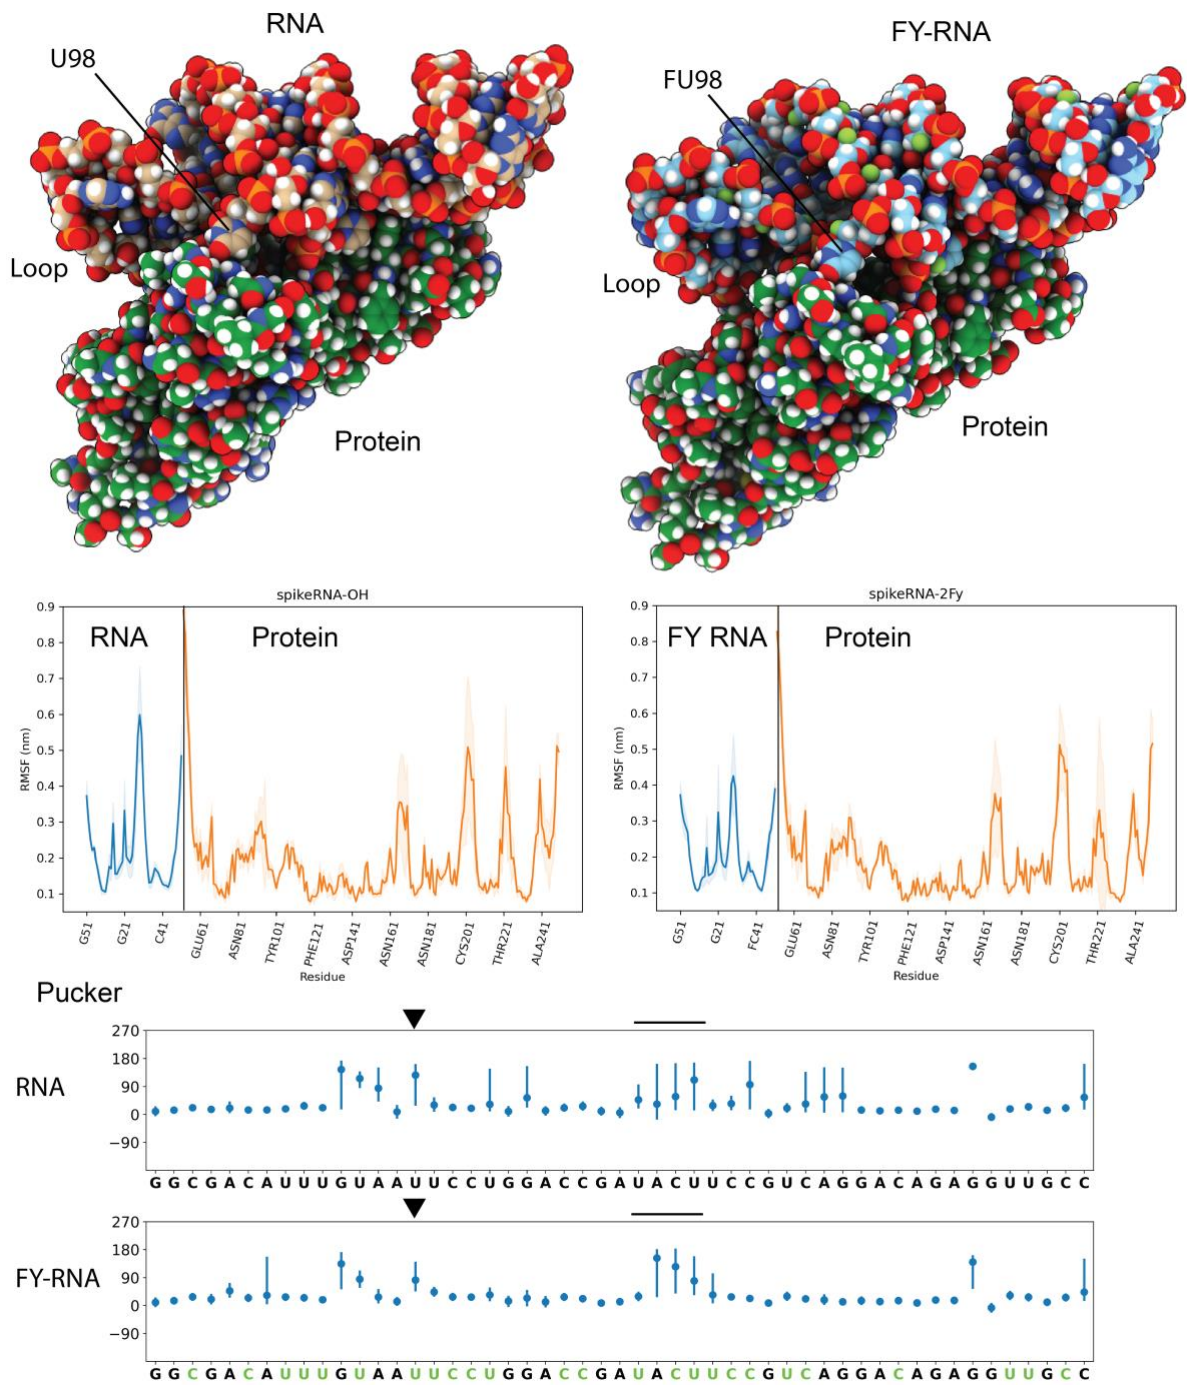

1  
 2 **Supplementary Fig. 21. MD-simulation of anti-Spike aptamer bound to the RBD.**  
 3 Simulated structures of the anti-spike aptamer as RNA and FY-RNA bound to the RBD protein.  
 4 Corresponding RMSF and Pucker plots are shown. The simulation reveals that fluctuation in  
 5 the anti-spike aptamer was highest at the loop region and at specific residues (discussed in the  
 6 main text). This fluctuation was particular high for RNA. Pucker plots with arrow heads  
 7 showing the important residue U98 in the aptamer. Line indicated the loop region.

1 **Supplementary Table 1. RNA sequences.**

2  
3 >PXT

4 GGAAUAUCGUC AUGGUGAUUCGUCACCAUGAGGCUAGAUCUCAUAUCUAGCGCUUUCGAGCGCUAGAGUCCUUAU  
5 CUAGCCGGUUUAUCUUUCGAGUGUGAACCCGAUAUUCGCGGAUCACUAUGAGUCGUUCGCGGCUCAUAGUCCG  
6 GCUCAAAAGGACAUC AUGGCCUGUUCGCGAGGUUGUGAUUAUGAGUGAGCCGGGUAAGGCAUACCGUUCGCGGUAUG  
7 UCUUACGAUCCGC

8  
9 >5HT-TC

10 GGGCACUUACCCUUUAGUGCGAAGGUUUCGACCUUCGAUCCAUUUGUUCGCAAUGGGGAUGAUCUUCGGAUCAUC  
11 CGCGUAGUCUGUUCAGUCGUUUCGACGACUGGCCCCACUUCGGUGGGGCCACGGUACUUAGAAGUGAACACUAAG  
12 UGUCGUGAACACCAUUUGGUUAACUGCUCAAAACUAAAUGGUGAUGAGGGGAAGGAAUGACCCUCAUCGGACUACGC  
13 GAUCCGAGUGAUGGGAAUGGCUGACCCAUCGCUCGGCACUGGAGGGUGAGUGCCCCUCAUUCGCAUAAGGGCCGA  
14 CCCAGACAACAGCCAAGUUUGGGUCGAGAUUGCAACAUCACGCAUCUGAACGGUUGAGAACUUACAAGGGCA  
15 AGAGCAGAGUCCUUGUAAGGGCUUACACGUCACAGUUCACAGACGUGUAAGGCCGUCGCCUUCGGGGCGACGU  
16 UCACGGCAUUUCGAUGCCGUGCAGCCUGUUCGCGAGGCUCUUGACCGUUCGCCUUCGAGGGCAGACUAC  
17 UCUUCGGAGUAGUCUUAUGUGAAUGAG

18  
19 >6HBC

20 GGGAGAGUACUAUUCAGAUUCAGACCCGCAAGUUCAGAGCGGUUUGCAUCUAGGGUACGUUUUCGAACGUAUCCUC  
21 CGACUAAGUGUAUUCGUAUACUUGAGCCUUGUGCCUGCUUCGGCAGGCAUGACCCAAUUGGCCUUUCGGGGCA  
22 CAUUUCCGGUCAUCCAAGUUCGCUUGGGUGAUGCGGGCGUAUAGGUUCGUCUAUACGUCCGCGUUUCCGAGAAG  
23 AGGUAACUCGGGAAACCGGUCCACGUGACAAAGGUAGAGUACGUGGAGGGAGCAGCUGCAAAGGGAUAAUGCAG  
24 UUGCUGGCUGGAUGCCAGAACUCACGACUGGCAUCUACGGGGAUUGGUCUCUCCAAUUCUCCAUUUACCGCCGA  
25 AUCGACCCCAACGUGAGAGGGGUCGGUUCUCCCGAGCAUAGACCAAUAUCCAGGUUUUAUGCUCCCAACGCUUGA  
26 CGAACUACCUACGUCUAGCGUUCGGCAAUUGAGUCAUACCUAGACUUAUUUGCGGUGCCUGAGCCUAAACUG  
27 AACAUUGGUUUCAGGCAUCUUGGCUCAGUUCGUCGAGCCGACGGUAGCGCUGCGUUCGCGCAGUGCUAGGGAGC  
28 AUCCGUUUUCGAGCGGAUGCUGGGCGGUUGCCUGUUCGCGAGGCAAUCGGGCCUACUCAUGAUUCGUAUGAGUGG  
29 UGACAGCGUGAUGUUCGCAUUACGCUUGCGGGUAGAUGGAGAAU

30  
31 >3HT-BP

32 GGAUACGUCUACGCUCAGUGACGGACUCUCUUCGGAGAGUCUGACAUCCGAACCAUACACGGAUGUGCCUCGCCG  
33 AACAGUCUACGGCGAGCUUAAGCGCUGGGGACGCCAACGCAUCACAAAGACUGAGUGAUGAACAGAAUGG  
34 ACUGGUUUCGUGUGGUGGAGACGGUCGGGUCCAGUUCGUCGUCGAGUAGAGUGUGGGCUCUACGACGCCGUUA  
35 AGGUCCCCAAUCGUGGCGUGUCGGCCUGCUUCGGCAGGCACUGGCGCCGGGACCUUGAAGAGAUGAGAUUUCGAU  
36 CUCAUCUUUGGGUGUCUCUGGUGCUUUGAGGGCCUGUGUUCGCGACAGGGCCGUCACUGGGUGUGGACGUAUC

37  
38 >Traptamer

39 GGAAUCUCGCCCCGAUGUUCGCAUCGGGAUUUGCAGGUCCAUGGAUUACACCAUGCAACGCAGACCUGUAGAUGCC  
40 ACGCUAGCCGUGGUGAGGGUCGGGUCCAGAUUGCAUUCGACUUAACGCGCCUAGCGUUGAAGGCGUGUAGAG  
41 CAGAUAGUUCGCUAUCUGGGGAGCCUGUUCGCGAGGCUCAGGAGCCUUCGGGCUCUAGCGCUAUUACCCCGGACA  
42 CCACCGGGCAGACAAGUAAUGGUGCUCCUCGAAUGACUUCUGUUGAGUAGAGUGUGGGCUCGCGGCUAGUGUGC  
43 ACCUAGCGGUGAAUGUCUGACACCGUUAAGGUGGUUACUCUUCGGAGUAACGCCGAGAUUC

44  
45 >PXT-antispikes

46 GGAAGGUGGGGCACUUCGUCGGAAGUGCCGGCAAGAUCUUCUACGUUCGCGUGCAAGACCAUCCAU  
47 CUUGCCCAGGCGACAUUUGUAAUUCUGGACCGAUACUUCGUCAGGACAGAGGUUGCCUGCCACCUUCCACGAC  
48 ACGGAAAGGGCUAUUCGUAUGCCUUUCCUUCGUCAGGAUGGAUCUACCGGUGUUCGCAUCGGUAGAUUGAGGGU  
49 GACGAAGAAUAUCGGAGGUGUUCGCGCCUUCGAUGUUGUGUCGU

1 **Supplementary Table 2. Cryo-EM data collection, refinement and validation statistics for**  
 2 **FY-RNA PXT and 5HT.**  
 3

|                                                  | #1 FY-RNA PXT<br>(J334)<br>(EMD-53787)<br>(PDB 9R7Q) | #2 FY-RNA 5HT<br>(J225)<br>(EMD-53795)<br>(PDB 9R7W) |
|--------------------------------------------------|------------------------------------------------------|------------------------------------------------------|
| <b>Data collection and processing</b>            |                                                      |                                                      |
| Magnification                                    | 130,000x                                             | 130,000x                                             |
| Voltage (kV)                                     | 300                                                  | 300                                                  |
| Electron exposure (e-/Å <sup>2</sup> )           | 60                                                   | 60                                                   |
| Defocus range (µm)                               | -2.0 to -0.8                                         | -2.0 to -0.8                                         |
| Pixel size (Å)                                   | 1.2                                                  | 1.2                                                  |
| # mics.                                          | 4,449                                                | 4,121                                                |
| Symmetry imposed                                 | Non                                                  | Non                                                  |
| Initial particle images (no.)                    | 2,200,102                                            | 1,516,345                                            |
| Final particle images (no.)                      | 434,756                                              | 314,600                                              |
| Map resolution (Å)                               | 4.41                                                 | 6.06                                                 |
| FSC threshold                                    | (0.143)                                              | (0.143)                                              |
| Map resolution range (Å)                         | 3.934-9.431                                          | 5.344-13.823                                         |
| <b>Refinement</b>                                |                                                      |                                                      |
| Initial model used (PDB code)                    | 8BTZ                                                 | 7PTS                                                 |
| Model resolution (Å)                             | 4.4                                                  | N.A.                                                 |
| FSC threshold                                    | (0.143)                                              |                                                      |
| Model resolution range (Å)                       | 4.0/4.4/6.1<br>(0/0.143/0.5)                         | N.A.                                                 |
| Map sharpening <i>B</i> factor (Å <sup>2</sup> ) | 150.2                                                | 329.1                                                |
| Model composition                                |                                                      |                                                      |
| Non-hydrogen atoms                               | 5050                                                 | 11752                                                |
| Nucleotide residues                              | 238                                                  | 552                                                  |
| Ligands                                          | 0                                                    | 0                                                    |
| <i>B</i> factors (Å <sup>2</sup> )               |                                                      |                                                      |
| Nucleic acid                                     | 80.06/874.00/214.30<br>(min/max/mean)                | 119.81/873.54/343.46<br>(min/max/mean)               |
| R.m.s. deviations                                |                                                      |                                                      |
| Bond lengths (Å)                                 | 0.003                                                | 0.002                                                |
| Bond angles (°)                                  | 1.111                                                | 1.048                                                |
| Validation                                       |                                                      |                                                      |
| MolProbity score                                 | 3.07                                                 | 2.91                                                 |
| Clashscore                                       | 26.89                                                | 18.43                                                |

4

1 **Supplementary Table 3. Cryo-EM data collection, refinement and validation statistics for**  
 2 **FY-RNA 6HBC.**  
 3

|                                                  | #3 FY-RNA 6HB-C<br>dimer (J174)<br>(EMD-54779)<br>(PDB 9SD9) | #4 FY-RNA 6HB-<br>C dimer (focus)<br>(J280) | #5 FY-RNA 6HB-<br>C mono. (J49)<br>(EMD-53803)<br>(PDB 9R82) |
|--------------------------------------------------|--------------------------------------------------------------|---------------------------------------------|--------------------------------------------------------------|
| <b>Data collection and processing</b>            |                                                              |                                             |                                                              |
| Magnification                                    | 130,000x                                                     | 130,000x                                    | 130,000x                                                     |
| Voltage (kV)                                     | 300                                                          | 300                                         | 300                                                          |
| Electron exposure (e-/Å <sup>2</sup> )           | 60                                                           | 60                                          | 60                                                           |
| Defocus range (µm)                               | -2.0 to -0.8                                                 | -2.0 to -0.8                                | -2.0 to -0.8                                                 |
| Pixel size (Å)                                   | 1.2                                                          | 1.2                                         | 1.2                                                          |
| # mics.                                          | 3,538                                                        | 3,538                                       | 3,538                                                        |
| Symmetry imposed                                 | Non                                                          | C2                                          | Non                                                          |
| Initial particle images (no.)                    | 87,516 (Topaz)                                               | 87,516 (Topaz)                              | 746,064                                                      |
| Final particle images (no.)                      | 49,938                                                       | 62,995 (sym. exp.)                          | 46,693                                                       |
| Map resolution (Å)                               | 9.6                                                          | 9.0                                         | 8.12                                                         |
| FSC threshold                                    | (0.143)                                                      | (0.143)                                     | (0.143)                                                      |
| Map resolution range (Å)                         | 8.546-15.913                                                 | 8.049-13.588                                | 7.749-17.945                                                 |
| <b>Refinement</b>                                |                                                              |                                             |                                                              |
| Initial model used (PDB code)                    | N.A.                                                         | N.A.                                        | N.A.                                                         |
| Model resolution (Å)                             | N.A.                                                         |                                             | N.A.                                                         |
| FSC threshold                                    |                                                              |                                             | (0.143)                                                      |
| Model resolution range (Å)                       | N.A.                                                         |                                             | N.A.                                                         |
| Map sharpening <i>B</i> factor (Å <sup>2</sup> ) | N.A.                                                         | N.A.                                        | N.A.                                                         |
| Model composition                                |                                                              |                                             |                                                              |
| Non-hydrogen atoms                               | 30671                                                        |                                             | 15523                                                        |
| Nucleotide residues                              | 1440                                                         |                                             | 728                                                          |
| Ligands                                          | 0                                                            |                                             | 0                                                            |
| <i>B</i> factors (Å <sup>2</sup> )               |                                                              |                                             |                                                              |
| Nucleic acid                                     | 166.38/1064.10/544.62<br>(min/max/mean)                      |                                             |                                                              |
| R.m.s. deviations                                |                                                              |                                             |                                                              |
| Bond lengths (Å)                                 | 0.001                                                        |                                             | 0.003                                                        |
| Bond angles (°)                                  | 0.902                                                        |                                             | 1.191                                                        |
| Validation                                       |                                                              |                                             |                                                              |
| MolProbity score                                 | 2.76                                                         |                                             | 3.04                                                         |
| Clashscore                                       | 12.43                                                        |                                             | 24.90                                                        |

4

1 **Supplementary Table 4. Cryo-EM data collection statistics for FY-RNA 3HT-BP and**  
 2 **Traptamer.**

3

|                                        | #6 FY-RNA 3HT-BP<br>(J214)<br>(EMD-55626) | #7 FY-RNA<br>Traptamer (J45)<br>(EMD-55635) |
|----------------------------------------|-------------------------------------------|---------------------------------------------|
| <b>Data collection and processing</b>  |                                           |                                             |
| Magnification                          | 130,000x                                  | 130,000x                                    |
| Voltage (kV)                           | 300                                       | 300                                         |
| Electron exposure (e-/Å <sup>2</sup> ) | 60                                        | 60                                          |
| Defocus range (µm)                     | -2.0 to -0.8                              | -2.0 to -0.8                                |
| Pixel size (Å)                         | 1.2                                       | 1.2                                         |
| # mics.                                | 8,642                                     | 4,121                                       |
| Symmetry imposed                       | Non                                       | Non                                         |
| Initial particle images (no.)          | 1,754,761                                 | 19,111 (Topaz)                              |
| Final particle images (no.)            | 107,281                                   | 7,214                                       |
| Map resolution (Å)                     | 6.42                                      | 9.93                                        |
| FSC threshold                          | (0.143)                                   | (0.143)                                     |
| Map resolution range (Å)               | 5.550-13.628                              | 8.920-17.344                                |

4

1 **Supplementary Table 5. Cryo-EM data collection, refinement and validation statistics**  
 2 **for FY-RNA PXT-Spike aptamer and Spike protein.**

|                                                  | #8 FY-RNA PXT<br>Spike trimer<br>(J586)<br>(EMD-55623) | #9 Spike RBD<br>+aptamer (focus)<br>(J620)<br>(EMD-55625)<br>(PDB 9T74) | #10 Spike NTD<br>(focus) (J598)<br>(EMD-55624) | #11 Spike<br>core (focus)<br>(J670)<br>(EMD-55622) | #12 FY-RNA<br>PXT (focus)<br>(J687)<br>(EMD-55621) |
|--------------------------------------------------|--------------------------------------------------------|-------------------------------------------------------------------------|------------------------------------------------|----------------------------------------------------|----------------------------------------------------|
| <b>Data collection and processing</b>            |                                                        |                                                                         |                                                |                                                    |                                                    |
| Magnification                                    | 130.000x                                               | 130.000x                                                                | 130.000x                                       | 130.000x                                           | 130.000x                                           |
| Voltage (kV)                                     | 300                                                    | 300                                                                     | 300                                            | 300                                                | 300                                                |
| Electron exposure (e-/Å <sup>2</sup> )           | 60                                                     | 60                                                                      | 60                                             | 60                                                 | 60                                                 |
| Defocus range (µm)                               | -2.0 to -0.8                                           | -2.0 to -0.8                                                            | -2.0 to -0.8                                   | -2.0 to -0.8                                       | -2.0 to -0.8                                       |
| Pixel size (Å)                                   | 0.971                                                  | 0.971                                                                   | 0.971                                          | 0.971                                              | 0.647                                              |
| Symmetry imposed                                 | no                                                     | C3                                                                      | C3                                             | C3                                                 | C1                                                 |
| Initial particle images (no.)                    | 875,298                                                | 875,298                                                                 | 875,298                                        | 875,298                                            | 1,506,092                                          |
| Final particle images (no.)                      | 433,417                                                | 736,847 (sym. exp.)                                                     | 794,657 (sym. exp.)                            | 1,300,251 (sym. exp.)                              | 109,814                                            |
| Map resolution (Å)                               | 2.90 (0.143)                                           | 3.46 (0.143)                                                            | 3.02 (0.143)                                   | 2.78 (0.143)                                       | 6.92 (0.143)                                       |
| FSC threshold                                    |                                                        |                                                                         |                                                |                                                    |                                                    |
| Map resolution range (Å)                         | 2.490 – 45.259                                         | 2.083 - 48.822                                                          | 2.387 - 46.248                                 | 2.342 - 46.369                                     | 6.581 - 13.878                                     |
| <b>Refinement</b>                                |                                                        |                                                                         |                                                |                                                    |                                                    |
| Initial model used (PDB code)                    |                                                        | N.A.                                                                    |                                                |                                                    |                                                    |
| Model resolution (Å)                             |                                                        | 3.4                                                                     |                                                |                                                    |                                                    |
| FSC threshold                                    |                                                        | (0.143)                                                                 |                                                |                                                    |                                                    |
| Model resolution range (Å)                       |                                                        | 3.3/3.4/3.5<br>(0/0.143/0.5)                                            |                                                |                                                    |                                                    |
| Map sharpening <i>B</i> factor (Å <sup>2</sup> ) |                                                        | 154.3                                                                   |                                                |                                                    |                                                    |
| <b>Model composition</b>                         |                                                        |                                                                         |                                                |                                                    |                                                    |
| Non-hydrogen atoms                               |                                                        | 2673                                                                    |                                                |                                                    |                                                    |
| Nucleotide residues                              |                                                        | 51                                                                      |                                                |                                                    |                                                    |
| Protein                                          |                                                        | 197                                                                     |                                                |                                                    |                                                    |
| Magnesium                                        |                                                        | 1                                                                       |                                                |                                                    |                                                    |
| NAG                                              |                                                        | 2                                                                       |                                                |                                                    |                                                    |
| <b><i>B</i> factors (Å<sup>2</sup>)</b>          |                                                        |                                                                         |                                                |                                                    |                                                    |
| Nucleic acid                                     |                                                        | 50.27/145.63/94.28                                                      |                                                |                                                    |                                                    |
| Protein                                          |                                                        | 10.46/92.43/38.98                                                       |                                                |                                                    |                                                    |
| Ligant (Mg)                                      |                                                        | 0.00/79.33/61.07<br>(min/max/mean)                                      |                                                |                                                    |                                                    |
| <b>R.m.s. deviations</b>                         |                                                        |                                                                         |                                                |                                                    |                                                    |
| Bond lengths (Å)                                 |                                                        | 0.025 (51)                                                              |                                                |                                                    |                                                    |
| Bond angles (°)                                  |                                                        | 2.532 (51)                                                              |                                                |                                                    |                                                    |
| <b>Validation</b>                                |                                                        |                                                                         |                                                |                                                    |                                                    |
| MolProbity score                                 |                                                        | 2.18                                                                    |                                                |                                                    |                                                    |
| Clashscore                                       |                                                        | 5.53                                                                    |                                                |                                                    |                                                    |

3

1 **Supplementary Table 6. Lifetime fluorescence measurements.**

2

|                                              | <b>RNA</b>       | <b>FY RNA</b>    |
|----------------------------------------------|------------------|------------------|
| <b>Lifetime of DFHBI-1T Broccoli aptamer</b> | 4.583 ± 0.005 ns | 4.564 ± 0.001 ns |
| <b>Lifetime of HBC620 Pepper aptamer</b>     | 3.97 ± 0.04 ns   | 4.117 ± 0.005 ns |

3  
4 The data was obtained by fitting fluorescence lifetime measurements by a  
5 monoexponential decay function. The data is noted as the mean ± standard deviation  
6 (n=3).

1 **Supplementary Video 1. MD simulation of PXT as RNA and FY-RNA.** The video shows  
2 that the helices of TL1 and TL3 (bottom) tend to interact and become parallel in the RNA PXT  
3 (left), whereas this is not observed for the FY-RNA PXT (right).

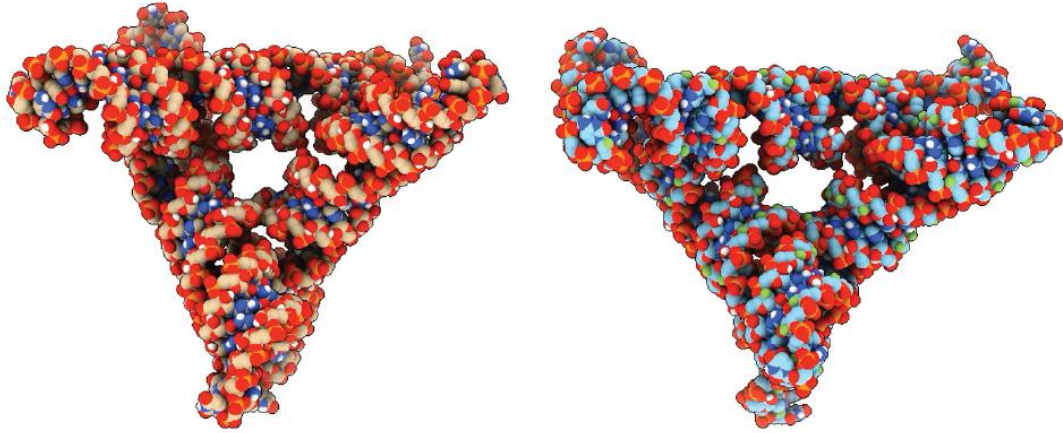

4 **Supplementary Video 2. MD simulation of 5HT as RNA and FY-RNA.** The video shows  
5 that the 5HT is more compact as RNA (left) and less compact as FY-RNA (right), which is  
6 likely due to less H-bond interactions between the helices.  
7

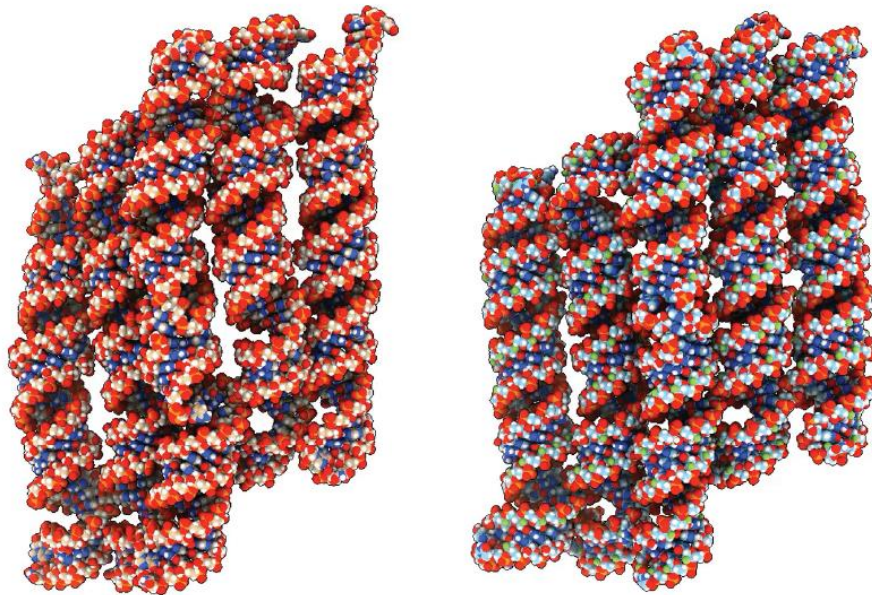

8  
9

1 **Supplementary Video 3. MD simulation of the X-90 crossover.** Simulated structures of the  
2 X-90 as RNA, FY-RNA and F-RNA (from left to right). The movie shows that RNA helices  
3 align in parallel, FY-RNA helices are more dynamic, and F-RNA helices make a stable  
4 conformation.

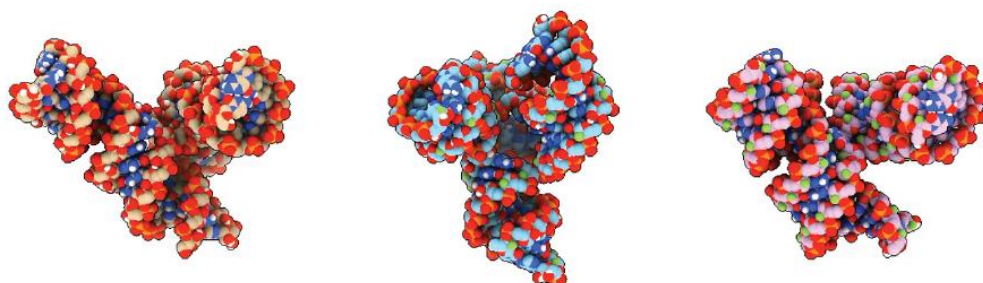

5 **Supplementary Video 4. MD simulation of anti-Spike aptamer bound to the RBD.**  
6 Simulated structures of the anti-spike aptamer as RNA (left) and FY-RNA (right) bound to the  
7 RBD protein. The movie shows that the tetraloop is more flexible and the U98 does to keep a  
8 stable stacking with Tyr505 as RNA.  
9

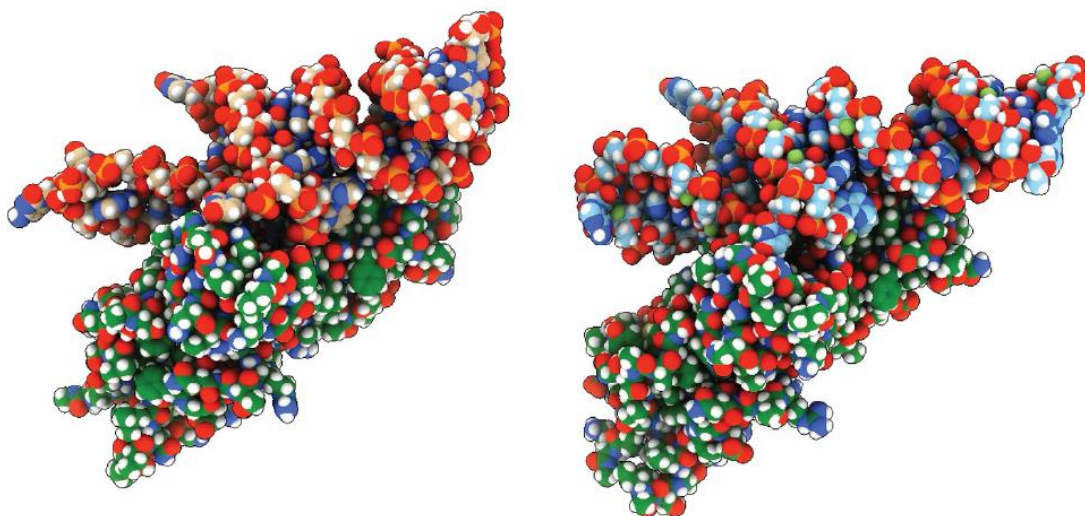

10  
11

1 **Supplementary Video 5. Detail of the MD simulation showing the FU98-Tyr505**  
2 **interaction.** The movie shows that the FU98-Tyr505 interaction is maintained during the MD  
3 simulation of the FY-RNA anti-Spike aptamer bound to the RBD.

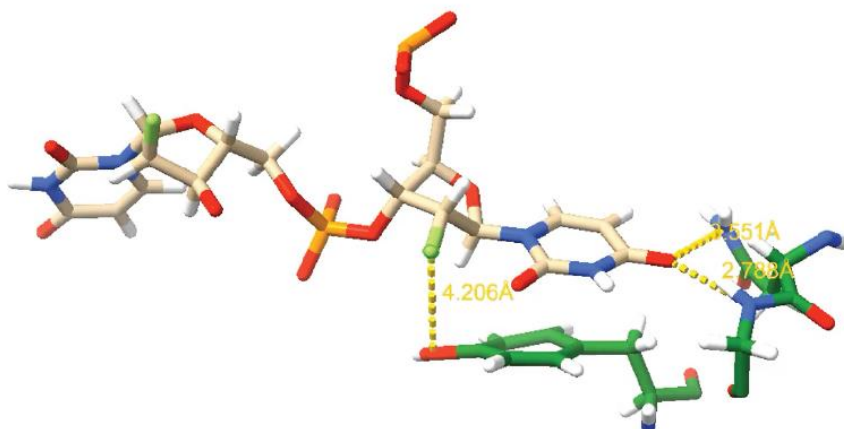

4 **Supplementary Video 6. Detail of the MD simulation showing the U98-Tyr505**  
5 **interaction.** Movie shows that the U98-Tyr505 interaction is maintained during the MD  
6 simulation of the anti-Spike aptamer bound to the RBD, when changed to RNA.  
7

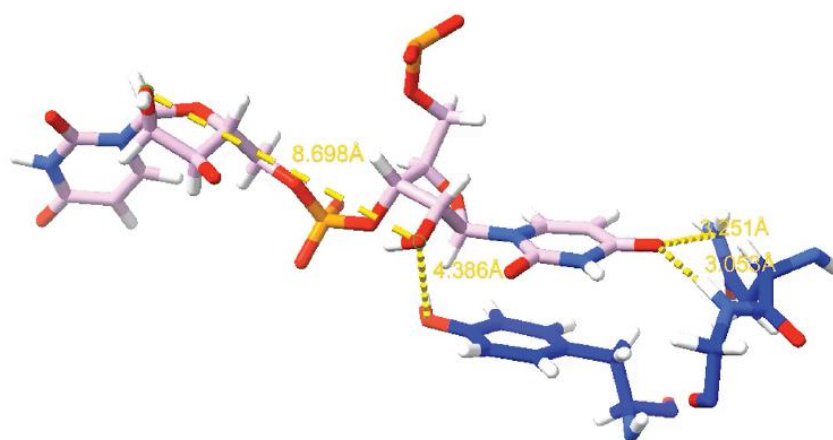

8
